# Supplementary material for: Synthesis, physicochemical characterization and antiproliferative activity of phosphino Ru(ii) and Ir(iii) complexes
Source: Royal Society of Chemistry journal article supplement (doi:10.1039/d2dt01055k), 2022-01-01
Supplement: d2dt01055k1.pdf [file d2dt01055k1.pdf]

# Synthesis, physicochemical characterization and antiproliferative activity of phosphino Ru(II) and Ir(III) complexes.

Urszula K. Komarnicka,<sup>a†\*</sup> Sandra Kozieł,<sup>a†</sup> Agnieszka Skórska-Stania,<sup>b</sup> Agnieszka Kyzioł,<sup>b</sup> Francesco Tisato<sup>c</sup>

<sup>a</sup>Faculty of Chemistry, University of Wrocław, Joliot-Curie 14, 50-383 Wrocław, Poland

<sup>b</sup>Faculty of Chemistry, Jagiellonian University in Krakow, Gronostajowa 2, 30-387 Krakow, Poland

<sup>c</sup>ICMATECNR, Corso Stati Uniti 4, 35127 Padova, Italy

<sup>†</sup> First Author, <sup>\*</sup>corresponding Author: [urszula.komarnicka@chem.uni.wroc.pl](mailto:urszula.komarnicka@chem.uni.wroc.pl)

Herein we present the synthesis of new complexes based on ruthenium(II) (Ru( $\eta^6$ -*p*-cymene)Cl<sub>2</sub>PPh<sub>2</sub>CH<sub>2</sub>OH (RuPOH), Ru( $\eta^6$ -*p*-cymene)Cl<sub>2</sub>P(*p*-OCH<sub>3</sub>Ph)<sub>2</sub>CH<sub>2</sub>OH (RuMPOH)) and iridium(III) (Ir( $\eta^5$ -Cp\*)Cl<sub>2</sub>P(*p*-OCH<sub>3</sub>Ph)<sub>2</sub>CH<sub>2</sub>OH (IrMPOH), Ir( $\eta^5$ -Cp\*)Cl<sub>2</sub>PPh<sub>2</sub>CH<sub>2</sub>OH (IrPOH) containing phosphine ligands with/without methoxy motif on phenyl rings (P(*p*-OCH<sub>3</sub>Ph)<sub>2</sub>CH<sub>2</sub>OH (MPOH) and PPh<sub>2</sub>CH<sub>2</sub>OH (POH)). The complexes were characterized by mass spectrometry, NMR spectroscopy (1D: <sup>1</sup>H, <sup>13</sup>C{<sup>1</sup>H}, <sup>31</sup>P{<sup>1</sup>H}, 2D: HMQC, HMBC, COSY NMR) and elemental analysis. All the complexes were structurally identified by single-crystal X-ray diffraction analysis. The Ru(II) and Ir(III) complexes have typical piano-stool geometry with a  $\eta^6$ -coordinated arene (Ru<sup>II</sup> complexes) or  $\eta^5$ -coordinated (Ir<sup>III</sup> compounds) and three additional sites of ligation occupied by two chloride ligands and the phosphine ligand. Oxidation of NADH to NAD<sup>+</sup> with high efficiency was catalyzed by complexes containing P(*p*-OCH<sub>3</sub>Ph)<sub>2</sub>CH<sub>2</sub>OH (IrMPOH and RuMPOH). The catalytic property might have important future applications in biological and medical fields like production of reactive oxygen species (ROS). Furthermore redox activity of complexes was confirmed by cyclic voltamperometry. Biochemical assays demonstrated the ability of Ir(III) and Ru(II) complexes to induce significant cytotoxicity in various cancerous cell lines. Furthermore we found that RuPOH and RuMPOH selectively inhibit proliferation of skin cancer cells (WM266-4; IC<sub>50</sub>, after 24h: *av.*48.3  $\mu$ M; after 72h: *av.*10.2  $\mu$ M) while Ir(III) complexes were found to be moderately active against prostate cancer cells (DU145).

# Graphical Abstract

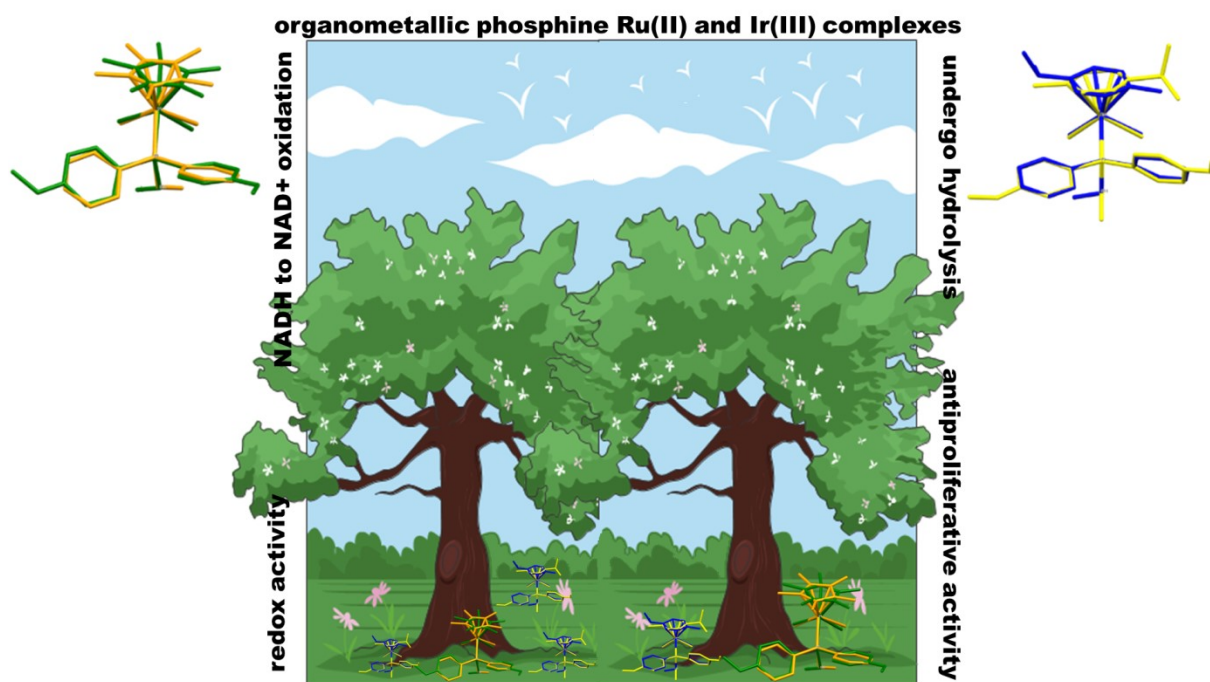

**Table S1.** Crystallographic experimental details.

| Identification code                                               | RuPOH                                                           | IrPOH                                                  | RuMPOH                                                             | IrMPOH                                                             |
|-------------------------------------------------------------------|-----------------------------------------------------------------|--------------------------------------------------------|--------------------------------------------------------------------|--------------------------------------------------------------------|
| <b>Crystal data</b>                                               |                                                                 |                                                        |                                                                    |                                                                    |
| Empirical formula                                                 | C <sub>23</sub> H <sub>27</sub> Cl <sub>2</sub> OPRu            | C <sub>23</sub> H <sub>28</sub> Cl <sub>2</sub> IrOP   | C <sub>25</sub> H <sub>31</sub> Cl <sub>2</sub> O <sub>3</sub> PRu | C <sub>25</sub> H <sub>32</sub> Cl <sub>2</sub> IrO <sub>3</sub> P |
| Formula weight                                                    | 522.38                                                          | 614.52                                                 | 582.44                                                             | 674.57                                                             |
| Temperature [K]                                                   | 100(2)                                                          | 293(2)                                                 | 293(2)                                                             | 100(2)                                                             |
| Wavelength [Å]                                                    | 1.54184                                                         | 0.71073                                                | 0.71073                                                            | 1.54184                                                            |
| Crystal system, space group                                       | Monoclinic, P 2 <sub>1</sub>                                    | Monoclinic, P 2 <sub>1</sub> /n                        | Monoclinic, P 2 <sub>1</sub> /n                                    | Monoclinic, P 2 <sub>1</sub> /n                                    |
| a, b, c [Å]                                                       | 7.6065(1),<br>13.8332(1),<br>10.7154(1)                         | 10.5605(1),<br>17.1832(2),<br>12.7618(1)               | 9.6600(1),<br>11.1867(1),<br>23.5077(3)                            | 8.5562(2),<br>20.6545(6),<br>13.9418(2)                            |
| β [°]                                                             | 105.490(1)                                                      | 93.613(1)                                              | 92.598(1)                                                          | 92.251(2)                                                          |
| V [Å <sup>3</sup> ]                                               | 1086.54(2)                                                      | 2311.19(4)                                             | 2537.71(5)                                                         | 2461.95(10)                                                        |
| Z                                                                 | 2                                                               | 4                                                      | 4                                                                  | 4                                                                  |
| Radiation type                                                    | Cu K <sub>α</sub>                                               | Mo K <sub>α</sub>                                      | Mo K <sub>α</sub>                                                  | Cu K <sub>α</sub>                                                  |
| μ [mm <sup>-1</sup> ]                                             | 8.881                                                           | 6.089                                                  | 0.916                                                              | 13.313                                                             |
| Crystal size [mm]                                                 | 0.40 x 0.25 x 0.10                                              | 0.20 x 0.20 x 0.20                                     | 0.50 x 0.30 x 0.20                                                 | 0.10 x 0.05 x 0.01                                                 |
| <b>Data collection</b>                                            |                                                                 |                                                        |                                                                    |                                                                    |
| Diffractometer                                                    | Rigaku (Cu) XtaLAB Synergy-DW VHF with a HyPix-Arc 150 detector | Rigaku OD SuperNova Dual source with an Atlas detector | Rigaku OD SuperNova Dual source with an Atlas detector             | Rigaku (Cu) XtaLAB Synergy-DW VHF with a HyPix-Arc 150 detector    |
| Absorption correction                                             | Multi-scan ( <i>CrysAlisPRO</i> ; Rigaku OD, 2020)              | Multi-scan ( <i>CrysAlisPRO</i> ; Rigaku OD, 2015)     | Multi-scan ( <i>CrysAlisPRO</i> ; Rigaku OD, 2015)                 | Multi-scan ( <i>CrysAlisPRO</i> ; Rigaku OD, 2020)                 |
| No. of measured, independent and observed [I > 2σ(I)] reflections | 9002/8981/3776                                                  | 35098/6202/5185                                        | 37574/6823/5422                                                    | 27876/5031/4572                                                    |
| R(int)                                                            | 0.0360                                                          | 0.0397                                                 | 0.0388                                                             | 0.0482                                                             |
| Completeness                                                      | 99.7 %                                                          | 99.6 %                                                 | 99.8 %                                                             | 99.6 %                                                             |
| <b>Refinement</b>                                                 |                                                                 |                                                        |                                                                    |                                                                    |
| Data / restraints / parameters                                    | 9002 / 1 / 261                                                  | 6201 / 0 / 270                                         | 6823 / 0 / 297                                                     | 5031 / 0 / 297                                                     |
| R[F <sup>2</sup> > 2σ(F <sup>2</sup> )], wR(F <sup>2</sup> ), S   | 0.0191, 0.0497, 1.201                                           | 0.0220, 0.0411, 1.075                                  | 0.0305, 0.0626, 1.069                                              | 0.0394, 0.1008, 1.095                                              |
| Δρ <sub>max</sub> , Δρ <sub>min</sub> (e Å <sup>-3</sup> )        | 0.376 and -0.427                                                | 0.850 and -0.614                                       | 0.350 and -0.470                                                   | 1.426 and -2.097                                                   |

Rigaku OD (2015). *CrysAlis PRO*. Rigaku Oxford Diffraction Ltd, Yarnton, Oxfordshire, England.

Rigaku OD (2020). *CrysAlis PRO*. Rigaku Oxford Diffraction, Yarnton, England.

Sheldrick, G. M. (2015a). *Acta Cryst.* **A71**, 3–8

**Table S2.** Hydrogen-bond geometry (Å, °)

| D-H...A                                                                                                                          | d(D-H)  | d(H...A) | d(D...A) | <(DHA) |
|----------------------------------------------------------------------------------------------------------------------------------|---------|----------|----------|--------|
| <b>RuPOH</b>                                                                                                                     |         |          |          |        |
| C11-H11A...Cl2                                                                                                                   | 0.99    | 2.89     | 3.487(4) | 120.0  |
| O11-H11...Cl1                                                                                                                    | 0.80(6) | 2.30(6)  | 3.059(3) | 159(5) |
| <b>IrPOH</b>                                                                                                                     |         |          |          |        |
| C26-H26...Cl1                                                                                                                    | 0.93    | 2.87     | 3.640(3) | 140.5  |
| C32-H32...Cl2                                                                                                                    | 0.93    | 2.96     | 3.606(3) | 127.6  |
| O11B_a-H10B_a...Cl1                                                                                                              | 0.82    | 2.20     | 2.957(3) | 153.0  |
| O11A_b-H10A_b...Cl2                                                                                                              | 0.82    | 2.32     | 3.099(9) | 159.7  |
| <b>RuMPOH</b>                                                                                                                    |         |          |          |        |
| C11-H11A...Cl1                                                                                                                   | 0.97    | 2.76     | 3.336(2) | 118.6  |
| C11-H11B...Cl2                                                                                                                   | 0.97    | 2.78     | 3.355(2) | 118.4  |
| C25-H25...O34_#1                                                                                                                 | 0.93    | 2.47     | 3.313(3) | 150.8  |
| C27-H27C...Cl2_#2                                                                                                                | 0.96    | 2.97     | 3.870(3) | 157.5  |
| C33-H33...Cl2_#3                                                                                                                 | 0.93    | 2.83     | 3.426(2) | 122.6  |
| O11-H11O...Cl1_#2                                                                                                                | 0.77(3) | 2.50(3)  | 3.259(2) | 171(3) |
| Symmetry transformations used to generate equivalent atoms:<br>#1 -x-1/2, y+1/2, -z+3/2 #2 -x, -y, -z+1 #3 -x+1/2, y+1/2, -z+3/2 |         |          |          |        |
| <b>IrMPOH</b>                                                                                                                    |         |          |          |        |
| C23-H23...Cl1#1                                                                                                                  | 0.95    | 2.72     | 3.444(6) | 133.5  |
| C32-H32...Cl1                                                                                                                    | 0.95    | 2.84     | 3.667(6) | 145.4  |
| C33-H33...Cl2#2                                                                                                                  | 0.95    | 2.99     | 3.590(6) | 122.6  |
| O11-H11...Cl2                                                                                                                    | 0.84    | 2.39     | 3.186(5) | 157.2  |
| Symmetry transformations used to generate equivalent atoms:<br>#1 x-1/2,-y+1/2,z+1/2 #2 x-1/2,-y+1/2,z-1/2                       |         |          |          |        |

**Table S3.** Cumulative NMR data (298 K,  $\delta$  [ppm], J [Hz]) for ligands (in CDCl<sub>3</sub>) and iridium-complexes (in CD<sub>2</sub>Cl<sub>2</sub>).

|                       | POHC <sup>40</sup> | MPOHC <sup>42</sup> | POH <sup>41</sup>  | MPOH <sup>42</sup>  | [Ir( $\eta^5$ -Cp <sup>*</sup> )Cl <sub>2</sub> ] <sub>2</sub> <sup>a</sup> | [Ru( $\eta^6$ -p-cymene)Cl <sub>2</sub> ] <sub>2</sub> | IrPOH          | IrMPOH                  | RuPOH                  | RuMPOH                  |
|-----------------------|--------------------|---------------------|--------------------|---------------------|-----------------------------------------------------------------------------|--------------------------------------------------------|----------------|-------------------------|------------------------|-------------------------|
| <sup>31</sup> P       | <b>-11.46</b>      | <b>15.23</b>        | <b>-9.33</b>       | <b>-13.60</b>       |                                                                             |                                                        | <b>-7.15</b>   | <b>-9.18</b>            | <b>16.74</b>           | <b>15.07</b>            |
| H <sup>Ph(m)</sup>    | 7.52-7.21          | 7.25-7.82           | 7.60-7.31          | 7.25-7.82           |                                                                             |                                                        | 7.41-7.54 m    | 7.70 t (9.34)           | 7.41-7.58 m            | 7.77 t (9.07)           |
| H <sup>Ph(o)</sup>    |                    |                     |                    |                     |                                                                             |                                                        | 7.72-7.84 m    | 6.98 dd (8.80;<br>1.50) | 7.79-7.93 m            | 6.98 dd (8.66;<br>1.40) |
| H <sup>1</sup>        | 4.32 d<br>(7.7)    | 5.03 s              | 4.42 d (8.39)      | 4.27 d (9.01)       |                                                                             |                                                        | 4.97 d (6.6)   | 4.86 s                  | 4.64 s                 | 4.54 s                  |
| H <sup>-OH</sup>      |                    | not observed        | 1.80 m             | not observed        |                                                                             |                                                        | not observed   | not observed            | not observed           | not observed            |
| H <sup>-OCH3</sup>    |                    | 3.87 s              |                    | 3.74 s              |                                                                             |                                                        |                | 3.85 s                  |                        | 3.86 s                  |
| C <sup>Ph(i)</sup>    | 135.65 d<br>(12.0) | 106.89 d<br>(84.47) | 135.65 d<br>(12.0) | 126.28 d<br>(9.08)  |                                                                             |                                                        |                | 118.82 d (55.4)         | 132.49 d<br>(15.2)     | 123.14 d<br>(47.23)     |
| C <sup>Ph(o)</sup>    | 132.91 d<br>(17.6) | 115.63 d<br>(7.54)  | 132.91 d<br>(17.6) | 114.41 d<br>(7.27)  |                                                                             |                                                        | 133.80 d (9.9) | 113.93 d (10.9)         | 133.61 d (9.1)         | 114.15 s                |
| C <sup>Ph(m)</sup>    | 128.39 d<br>(5.6)  | 135.61 d<br>(9.99)  | 128.39 d<br>(5.6)  | 134.58 d<br>(19.07) |                                                                             |                                                        | 128.15 d (9.9) | 135.57 d (10.9)         | 128.55 d (9.1)         | 135.02 s                |
| C <sup>Ph(p)</sup>    | 128.64 s           | 164.03 s            | 128.64 s           | 160.42 s            |                                                                             |                                                        | 130.92 s       | 161.83 s                | 131.17 s               | 161.68 s                |
| C <sup>1</sup>        | 62.46 d<br>(13.0)  | 53.31 d<br>(59.04)  | 62.46 d<br>(13.0)  | 62.94 d<br>(14.53)  |                                                                             |                                                        | 64.25 d (39.1) | 64.87 d (31.06)         | 63.28 d (40.1)         | 63.51 d<br>(31.79)      |
| C <sup>-OCH3</sup>    |                    | 55.86 s             |                    | 55.23 s             |                                                                             |                                                        |                | 55.35 s                 |                        | 55.39 s                 |
| H <sup>Cp*(CH3)</sup> |                    |                     |                    |                     | 0.96 s                                                                      |                                                        | 1.40 d (2.19)  | 1.40 d (2.19)           |                        |                         |
| H <sup>2,3</sup>      |                    |                     |                    |                     |                                                                             | 1.29 d (6.9)                                           |                |                         | 0.93 d (7.0)           | 0.97 d (6.98)           |
| H <sup>4</sup>        |                    |                     |                    |                     |                                                                             | 2.93 spt (7.0)                                         |                |                         | 2.56 spt (7.0)         | 2.61 spt (7.00)         |
| H <sup>6,7,8,9</sup>  |                    |                     |                    |                     |                                                                             | 5.42 dd (19.2;<br>6.0)                                 |                |                         | 5.27 dd (19.6;<br>6.2) | 5.25 s                  |
| H <sup>11</sup>       |                    |                     |                    |                     |                                                                             | 2.16 s                                                 |                |                         | 1.91 s                 | 1.89 s                  |
| C <sup>Cp*(CH3)</sup> |                    |                     |                    |                     | 9.38 s                                                                      |                                                        | 8.08 s         | 8.35 s                  |                        |                         |
| C <sup>Cp*</sup>      |                    |                     |                    |                     | 86.28 s                                                                     |                                                        | 92.28 d (2.2)  | 92.34 d (2.72)          |                        |                         |
| C <sup>2,3</sup>      |                    |                     |                    |                     |                                                                             | 22.12 s                                                |                |                         | 21.73 s                | 21.60 s                 |
| C <sup>4</sup>        |                    |                     |                    |                     |                                                                             | 30.63 s                                                |                |                         | 30.34 s                | 30.18 s                 |
| C <sup>5</sup>        |                    |                     |                    |                     |                                                                             | 101.22 s                                               |                |                         | 108.84 s               | 108.76 s                |
| C <sup>6,8</sup>      |                    |                     |                    |                     |                                                                             | 80.54 s                                                |                |                         | 86.42 d (5.4)          | 86.19 s                 |
| C <sup>7,9</sup>      |                    |                     |                    |                     |                                                                             | 81.32 s                                                |                |                         | 89.74 d (3.6)          | 89.31 s                 |
| C <sup>10</sup>       |                    |                     |                    |                     |                                                                             | 96.75 s                                                |                |                         | 95.60 s                | 95.14 s                 |
| C <sup>11</sup>       |                    |                     |                    |                     |                                                                             | 18.89 s                                                |                |                         | 17.70 s                | 17.57 s                 |

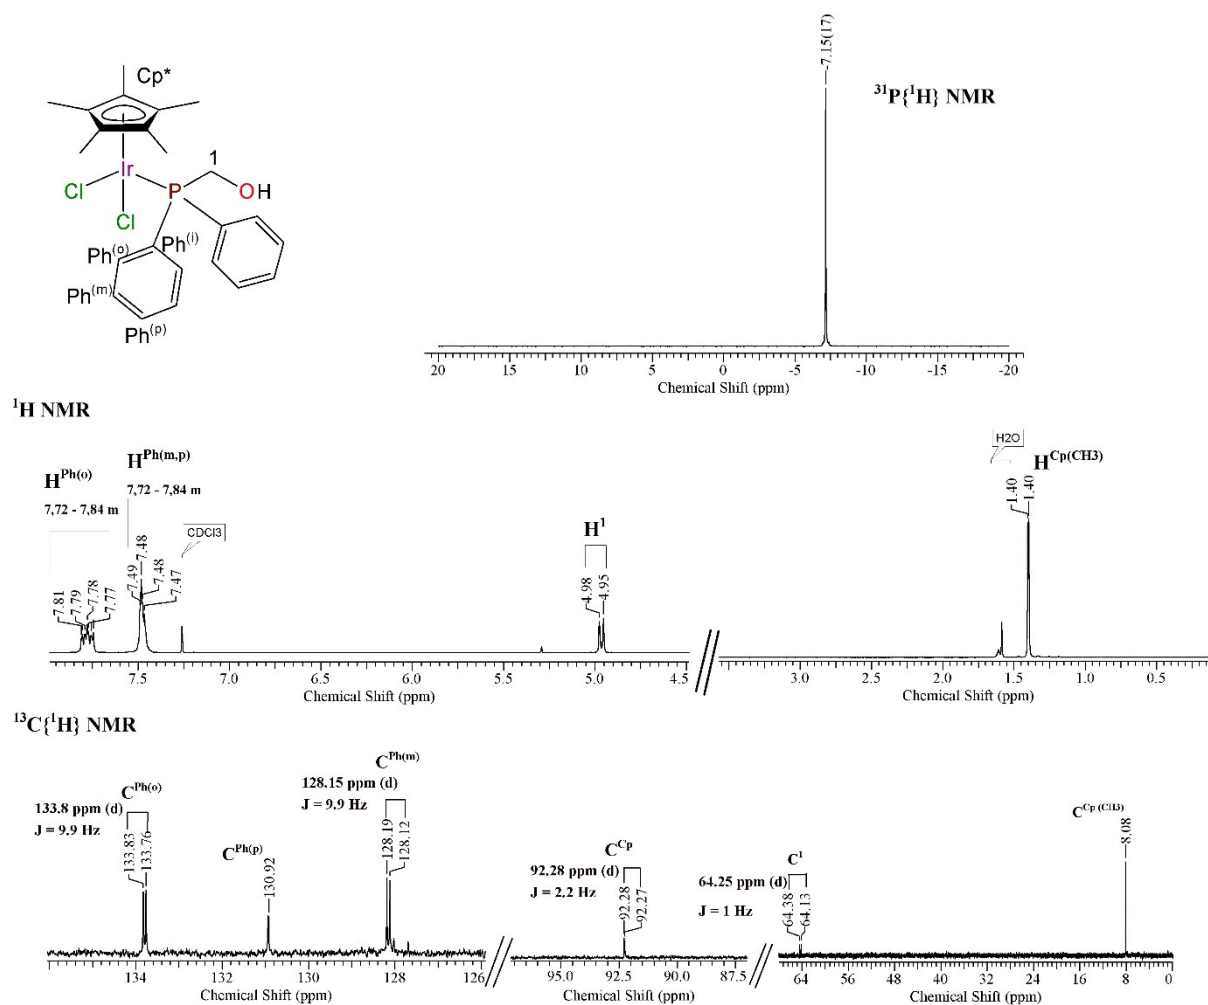

**Figure S1.**  $^1\text{H}$ ,  $^{13}\text{C}\{^1\text{H}\}$  and  $^{31}\text{P}\{^1\text{H}\}$  NMR spectra for IrPOH (298 K,  $\text{CDCl}_3$ ).

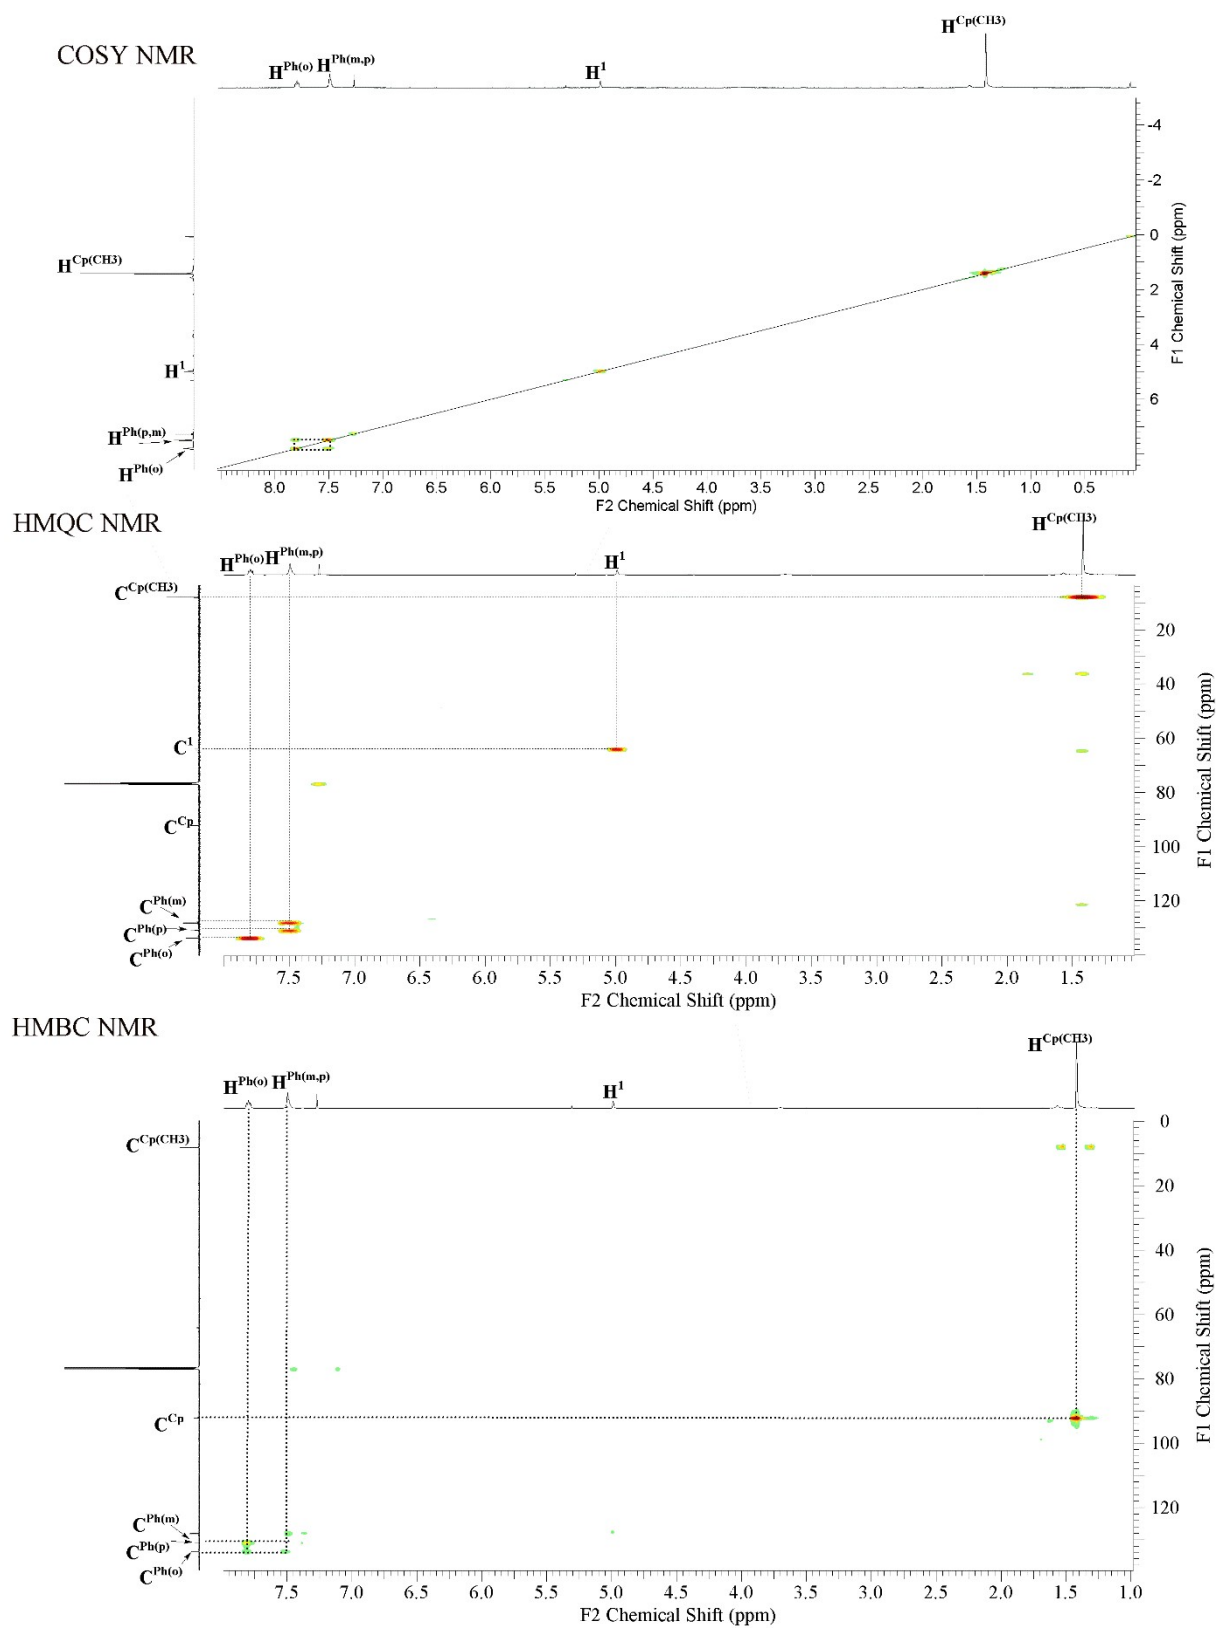

**Figure S2.** HMQC, HMBC, COSY NMR spectra for **IrPOH** (298 K,  $\text{CDCl}_3$ ).

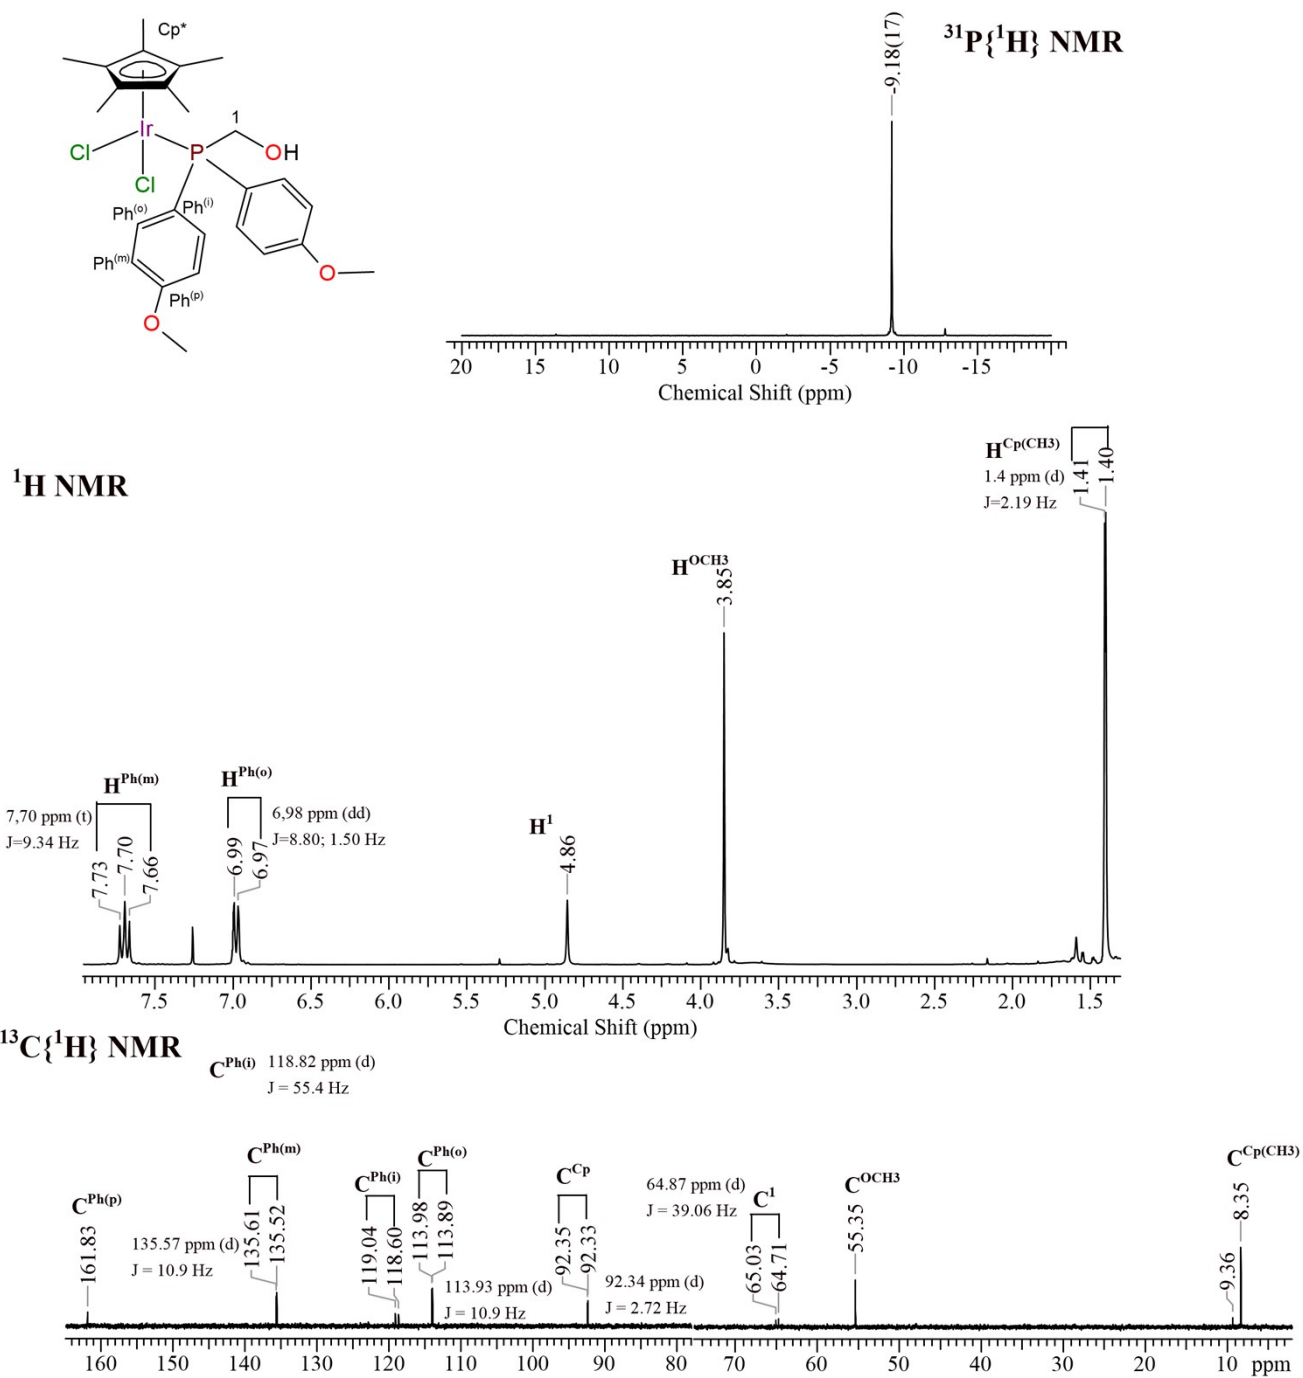

**Figure S3.**  $^1\text{H}$ ,  $^{13}\text{C}\{^1\text{H}\}$  and  $^{31}\text{P}\{^1\text{H}\}$  NMR spectra for IrMPOH (298 K,  $\text{CDCl}_3$ ).



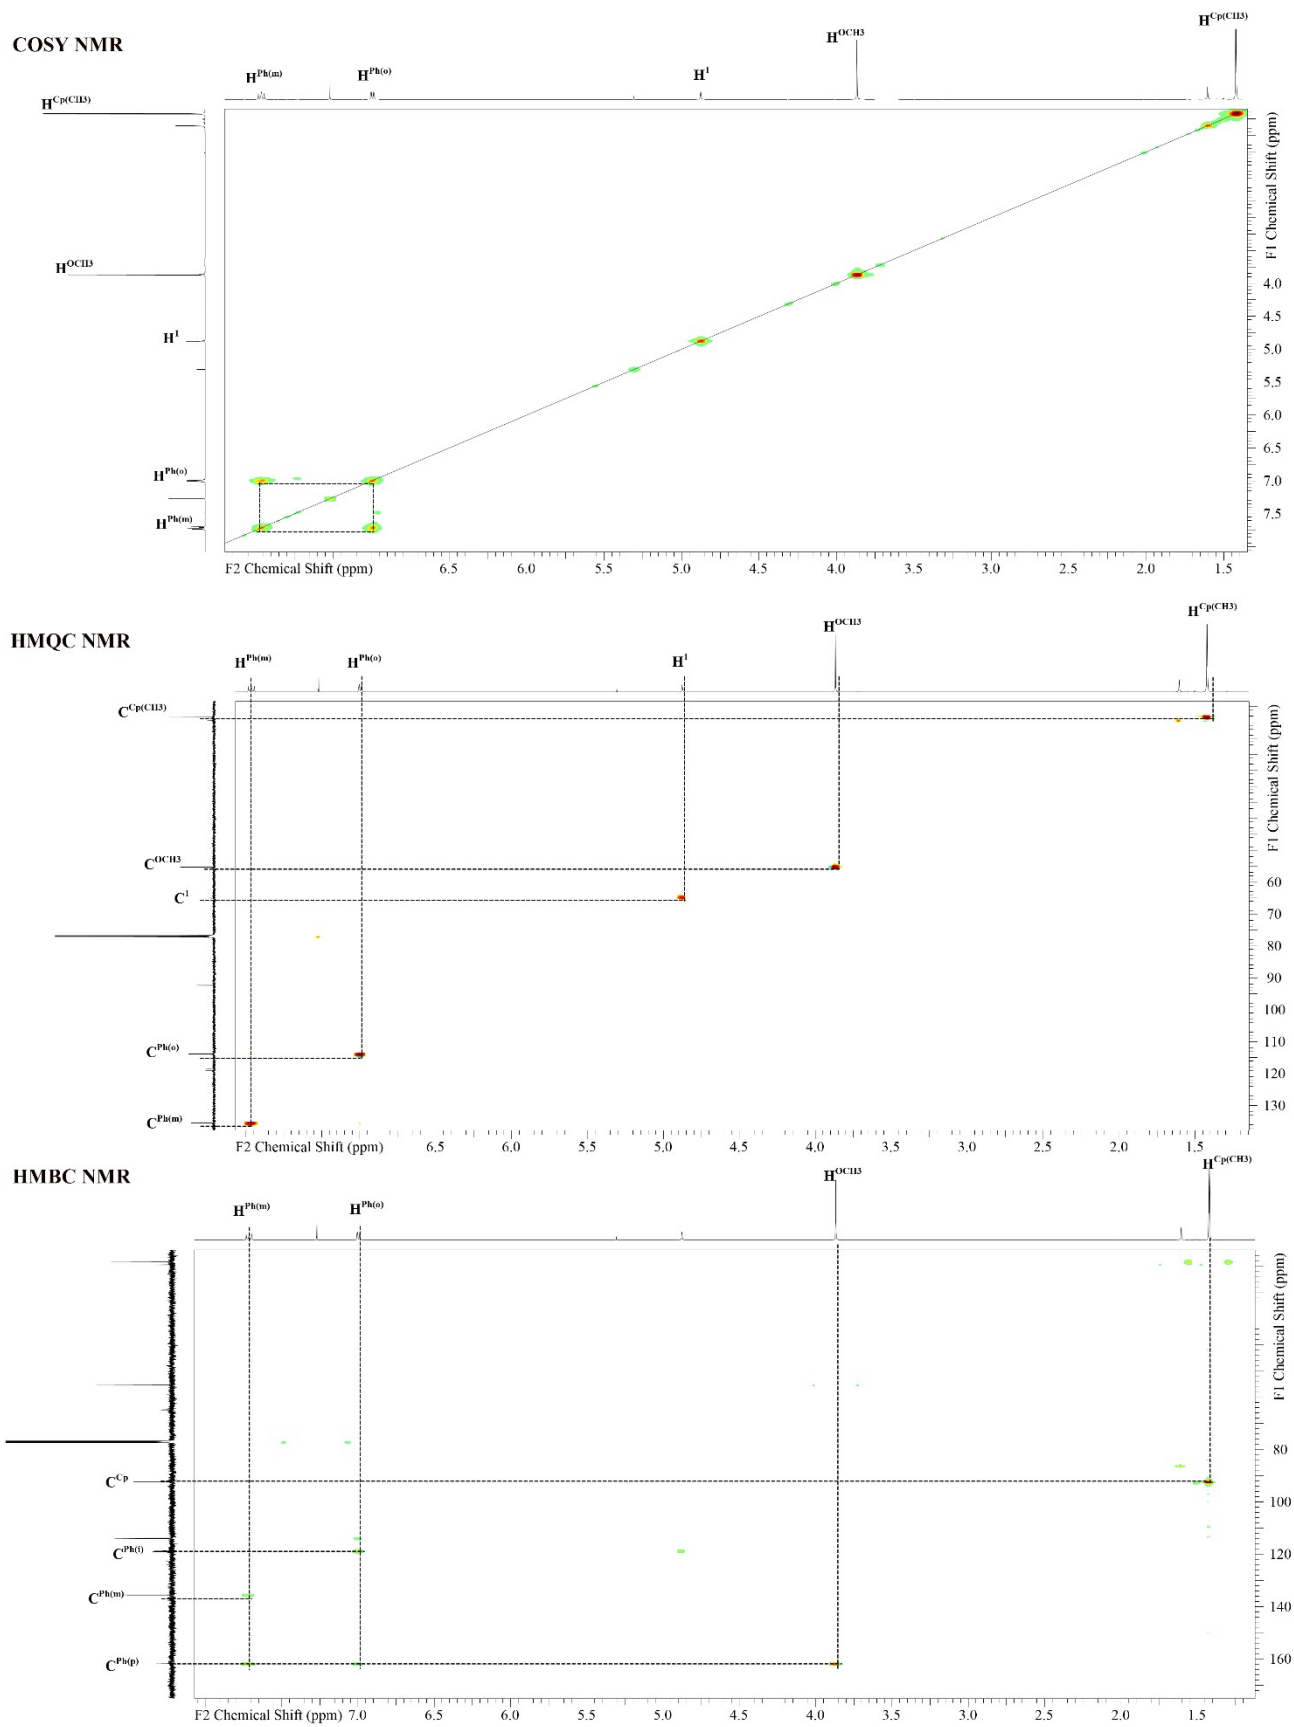

**Figure S4.** HMQC, HMBC, COSY NMR spectra for **IrMPOH** (298 K,  $\text{CDCl}_3$ ).

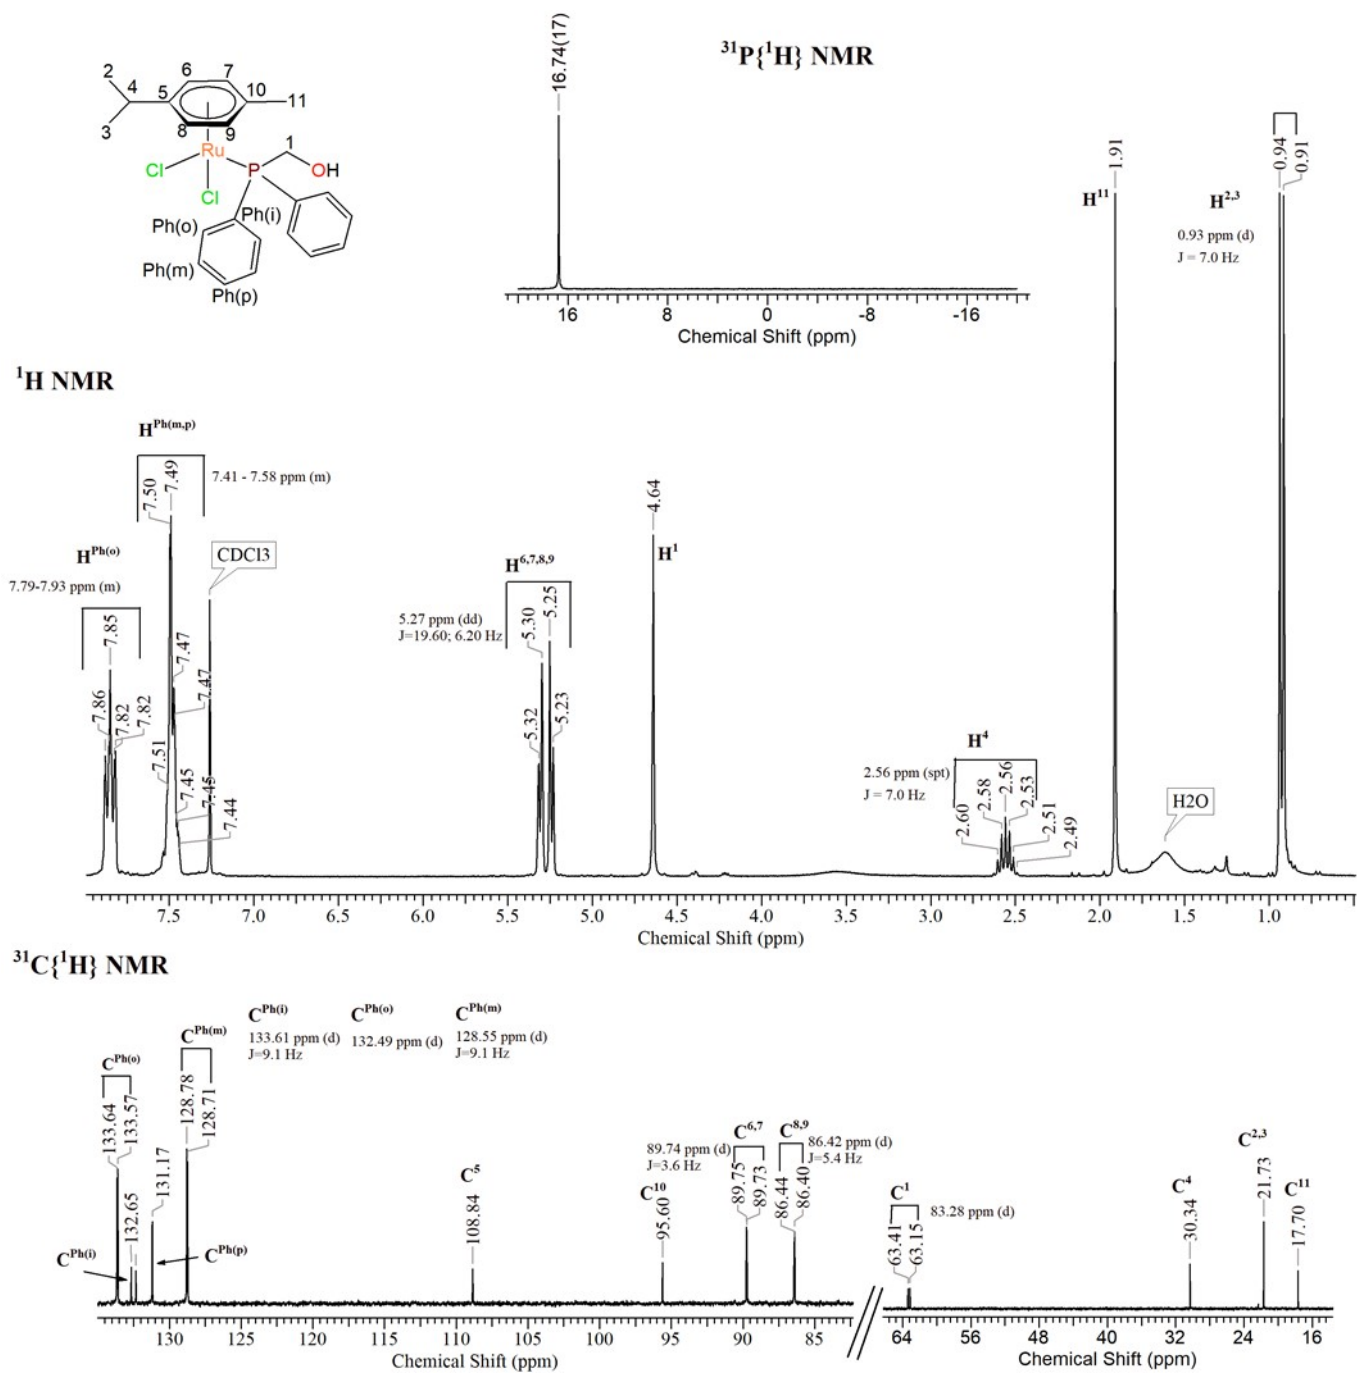

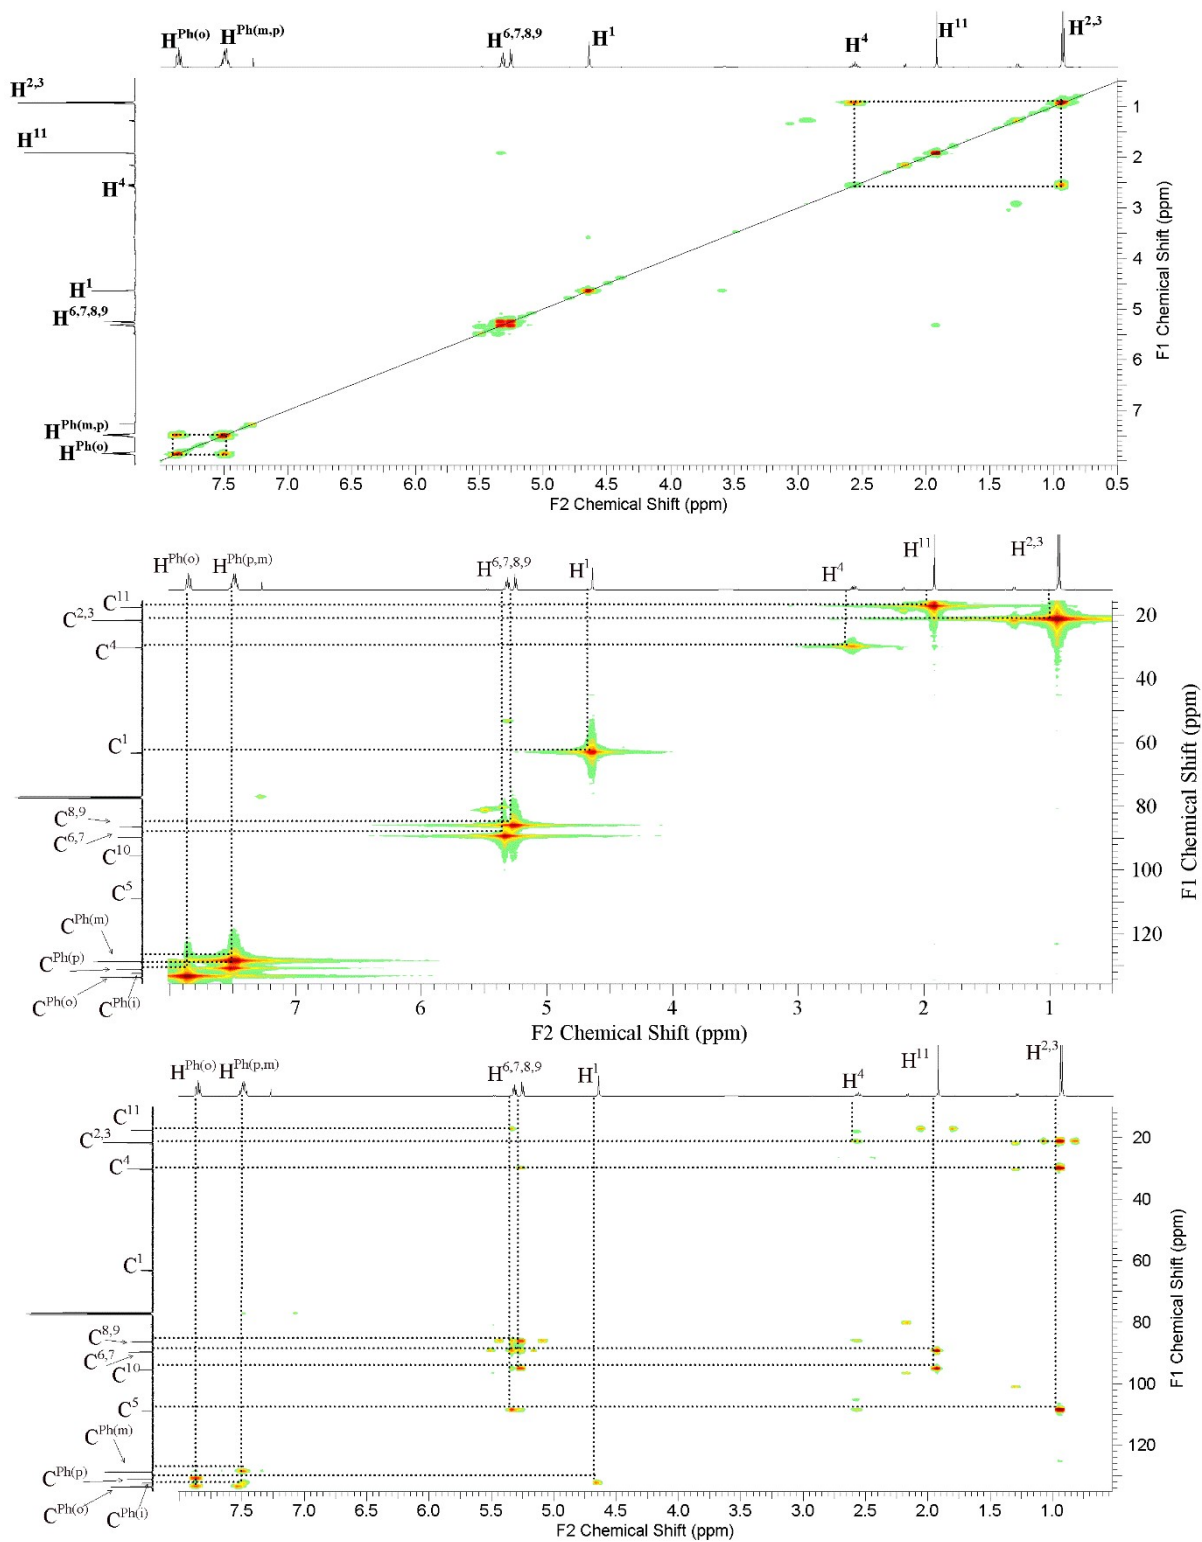

**Figure S6.** HMQC, HMBC, COSY NMR spectra for **RuPOH** (298 K, CDCl<sub>3</sub>).

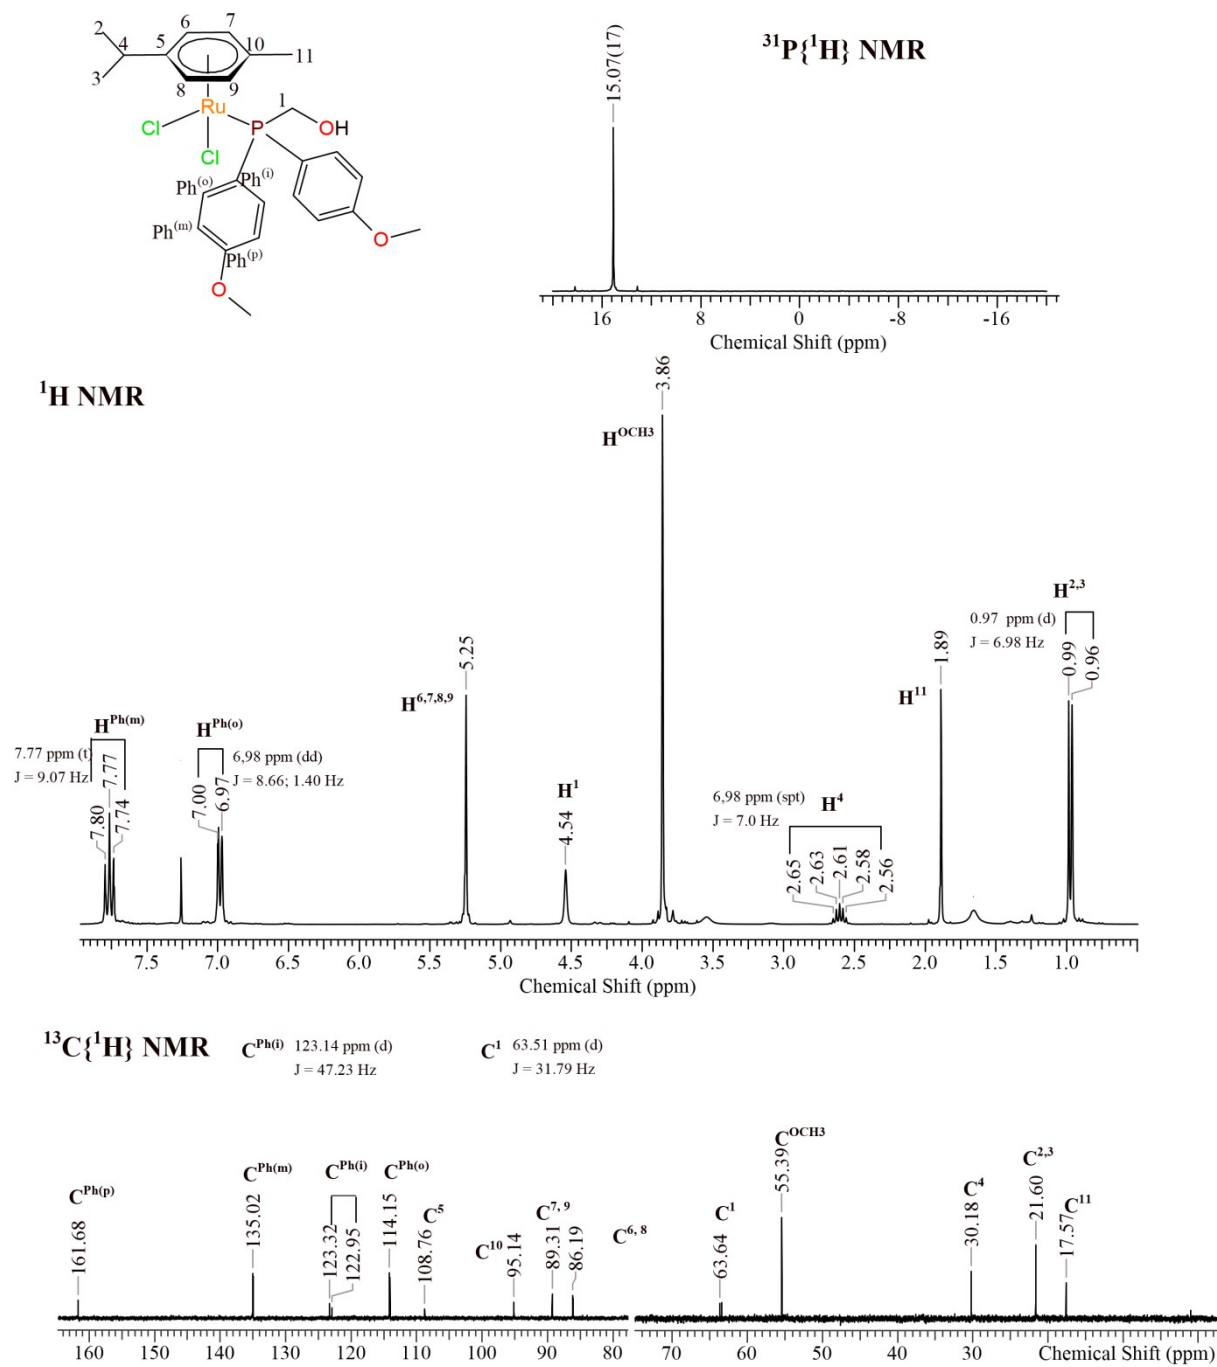

**Figure S7.**  $^1\text{H}$ ,  $^{13}\text{C}\{^1\text{H}\}$  and  $^{31}\text{P}\{^1\text{H}\}$  NMR spectra for **RuMPOH** (298 K,  $\text{CDCl}_3$ ).

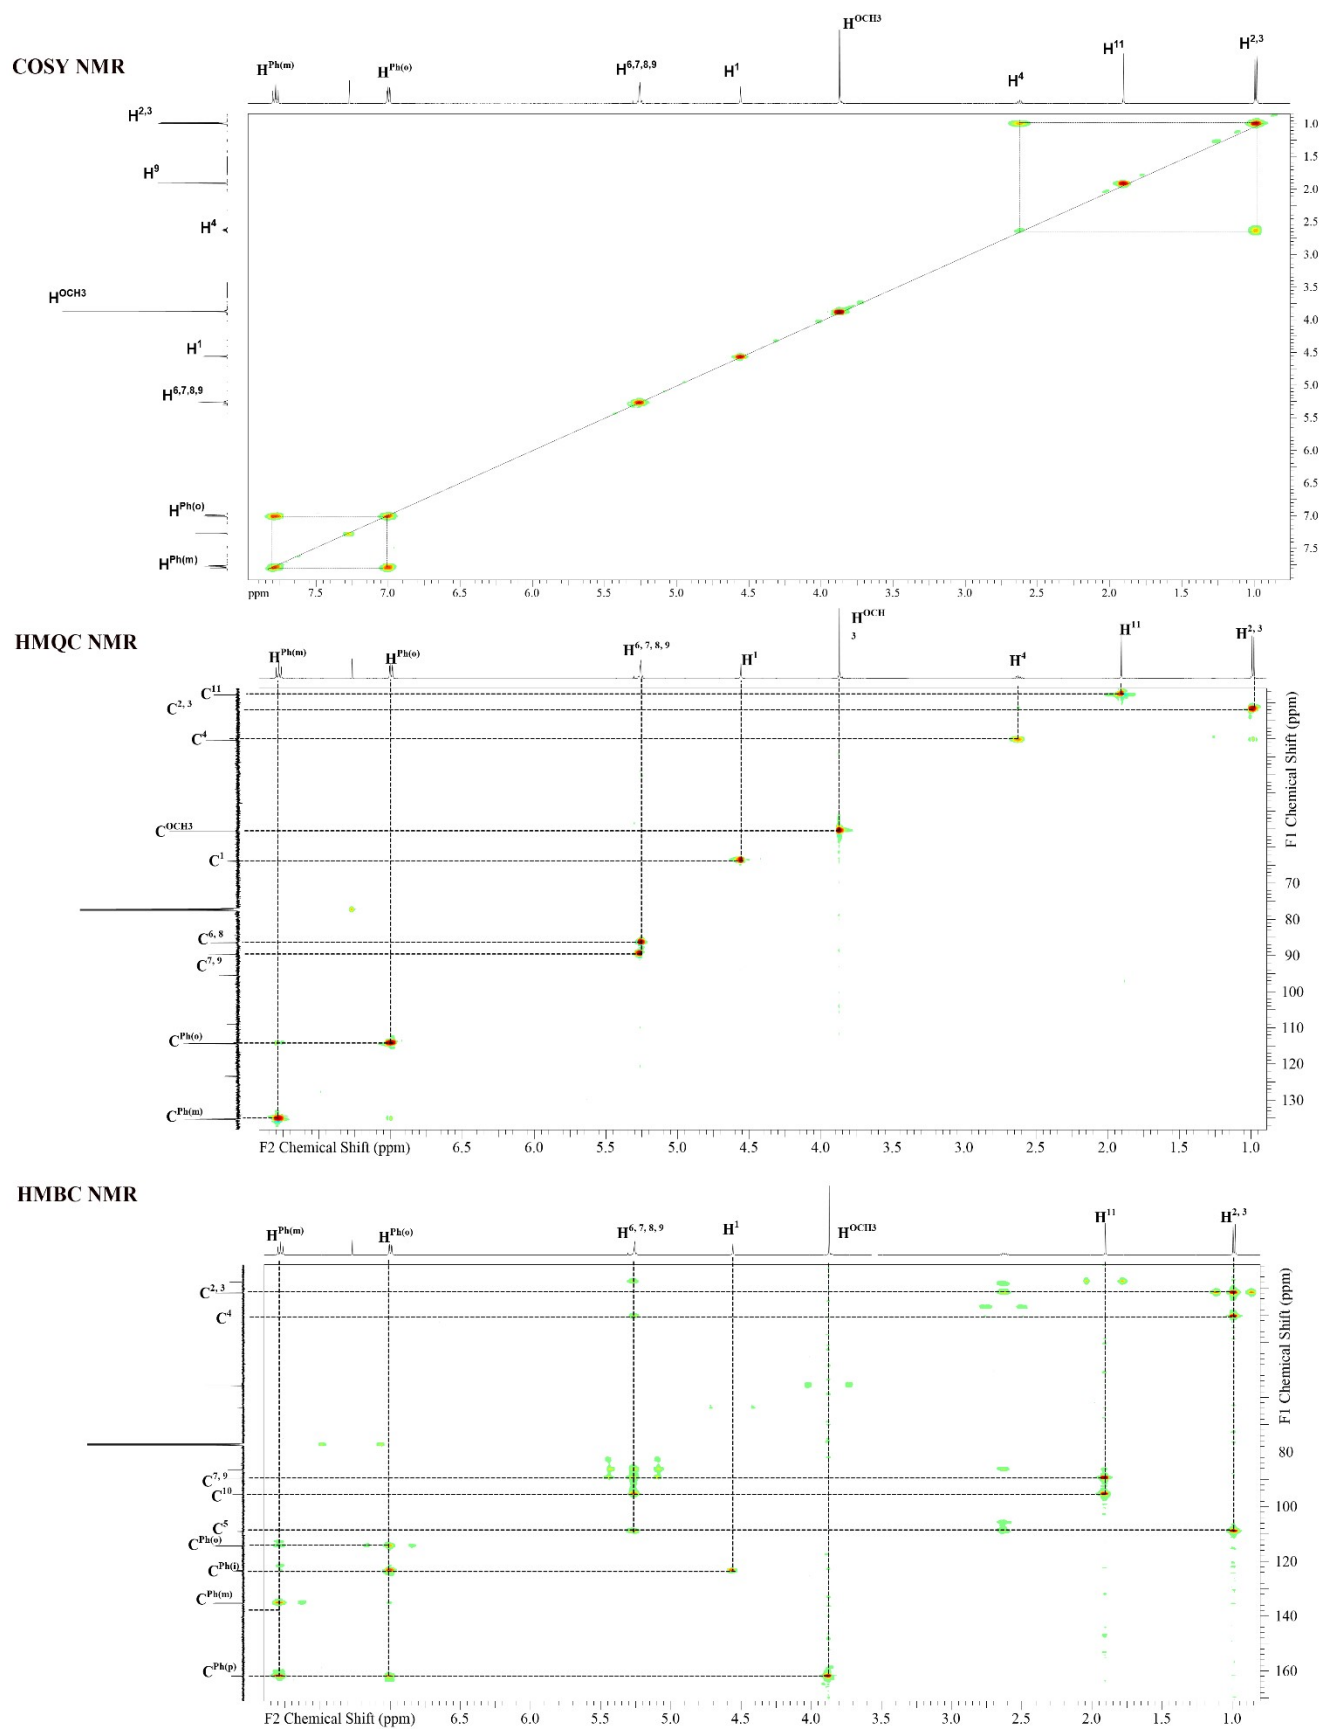

**Figure S8.** HMQC, HMBC, COSY NMR spectra for **RuMPOH** (298 K,  $\text{CDCl}_3$ ).

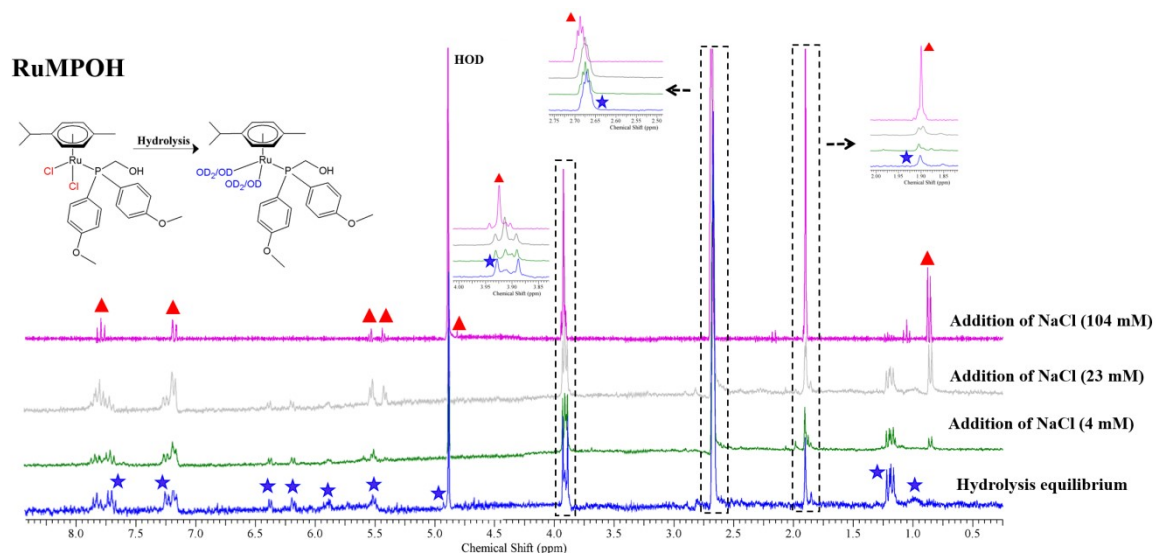

**Figure S9.** Confirmation of hydrolysis of **RuMPOH** by  $^1\text{H}$  NMR in 20%  $\text{DMSO-d}_6/80\%$   $\text{D}_2\text{O}$  (v/v) at 298 K. From bottom to top:  $^1\text{H}$  NMR spectrum of an equilibrium solution of **RuMPOH** (1 mM); spectrum recorded 10 min after addition of NaCl (final concentration, 4 mM) to the equilibrium solution of **RuMPOH**; final concentration of NaCl, 23mM; final concentration of NaCl, 104mM – respectively. The peaks for the chlorido complex **RuMPOH** (red triangle) increased in intensity while peaks for the aqua complex decreased (blue star).

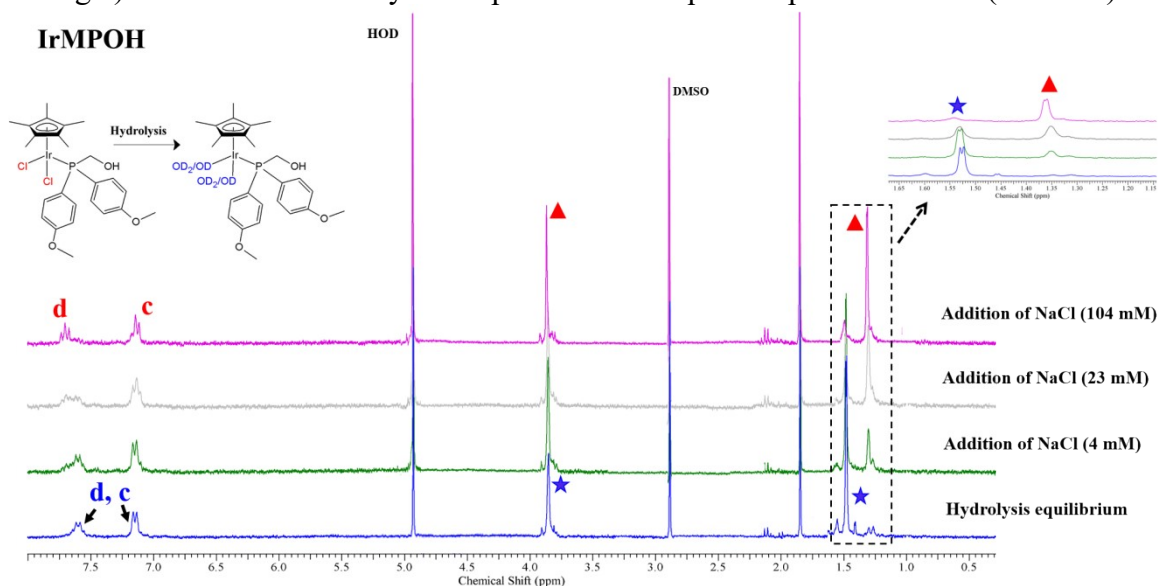

**Figure S10.** Confirmation of hydrolysis of **IrMPOH** by  $^1\text{H}$  NMR in 20%  $\text{DMSO-d}_6/80\%$   $\text{D}_2\text{O}$  (v/v) at 298 K. From bottom to top:  $^1\text{H}$  NMR spectrum of an equilibrium solution of **IrMPOH** (1 mM); spectrum recorded 10 min after addition of NaCl (final concentration, 4 mM) to the equilibrium solution of **IrMPOH**; final concentration of NaCl, 23mM; final concentration of NaCl, 104mM – respectively. The peaks for the chlorido complex **IrMPOH** (red triangle) increased in intensity while peaks for the aqua complex decreased (blue star).

Ir PK010 CHCl3 MeOH bis Z 637\_181116110705 #1 RT: 0,00 AV: 1 NL: 4,15E4  
T: ITMS + c ESI Full ms [155,00-1500,00]

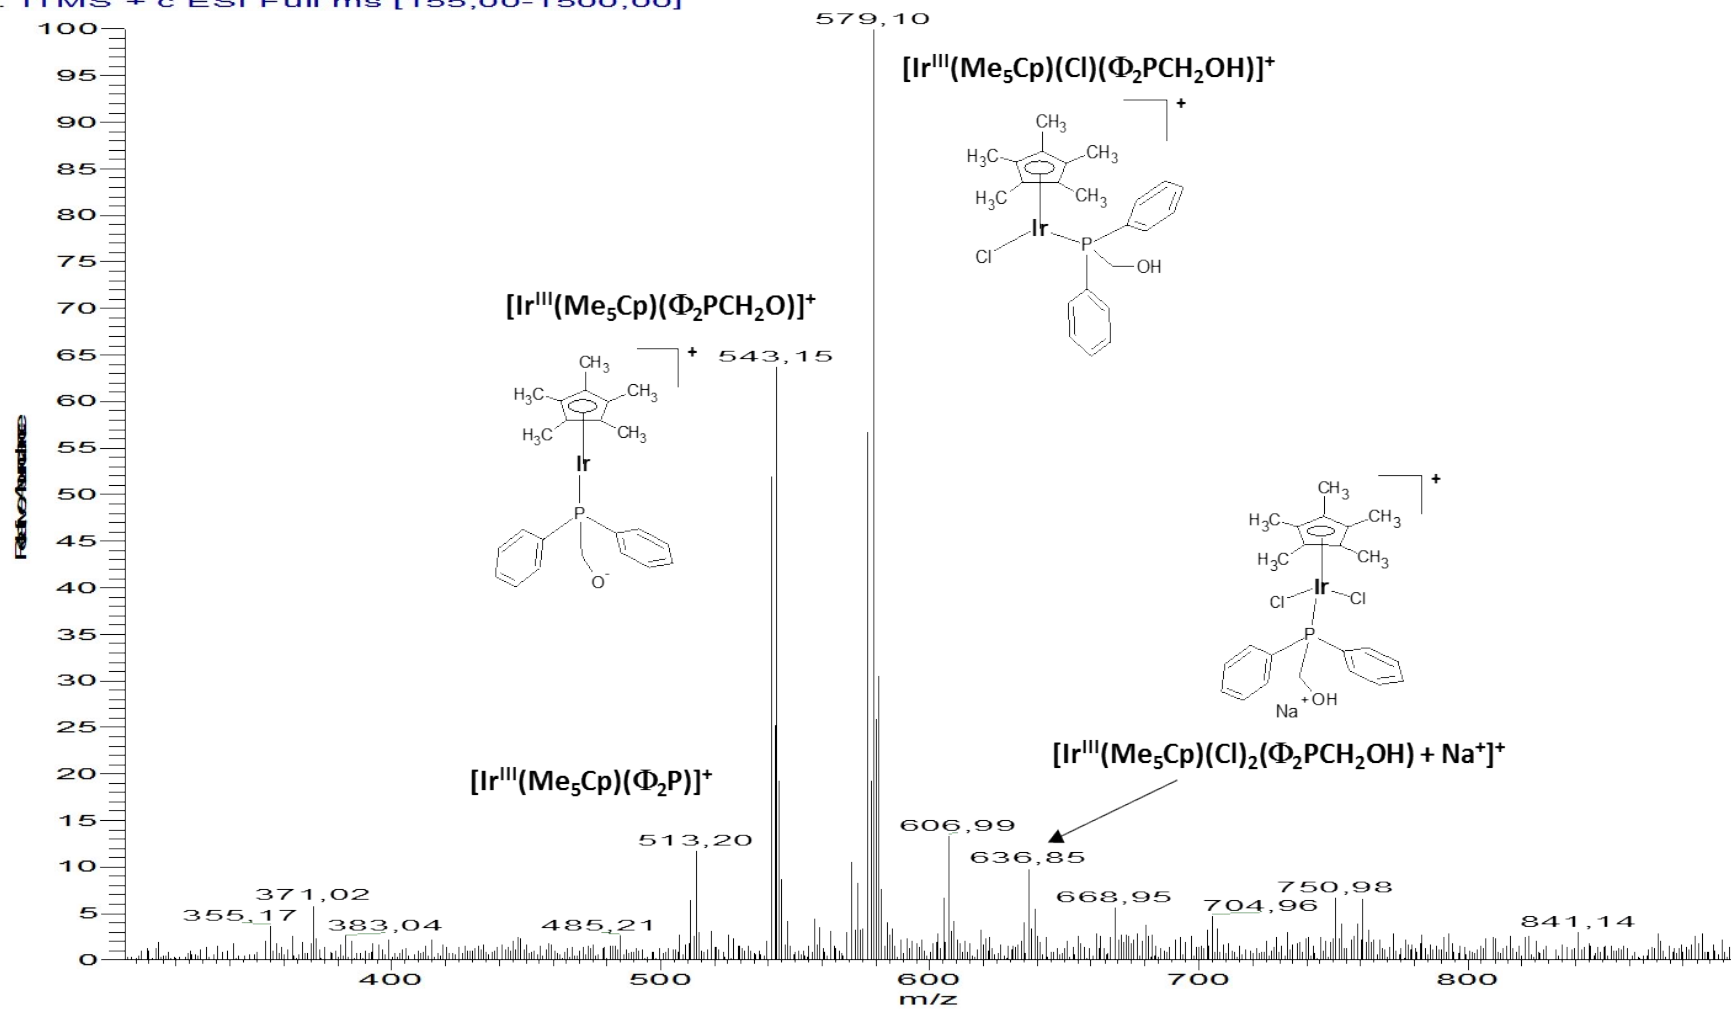

Figure S11. Full ESI(+)-MS spectrum of IrPOH

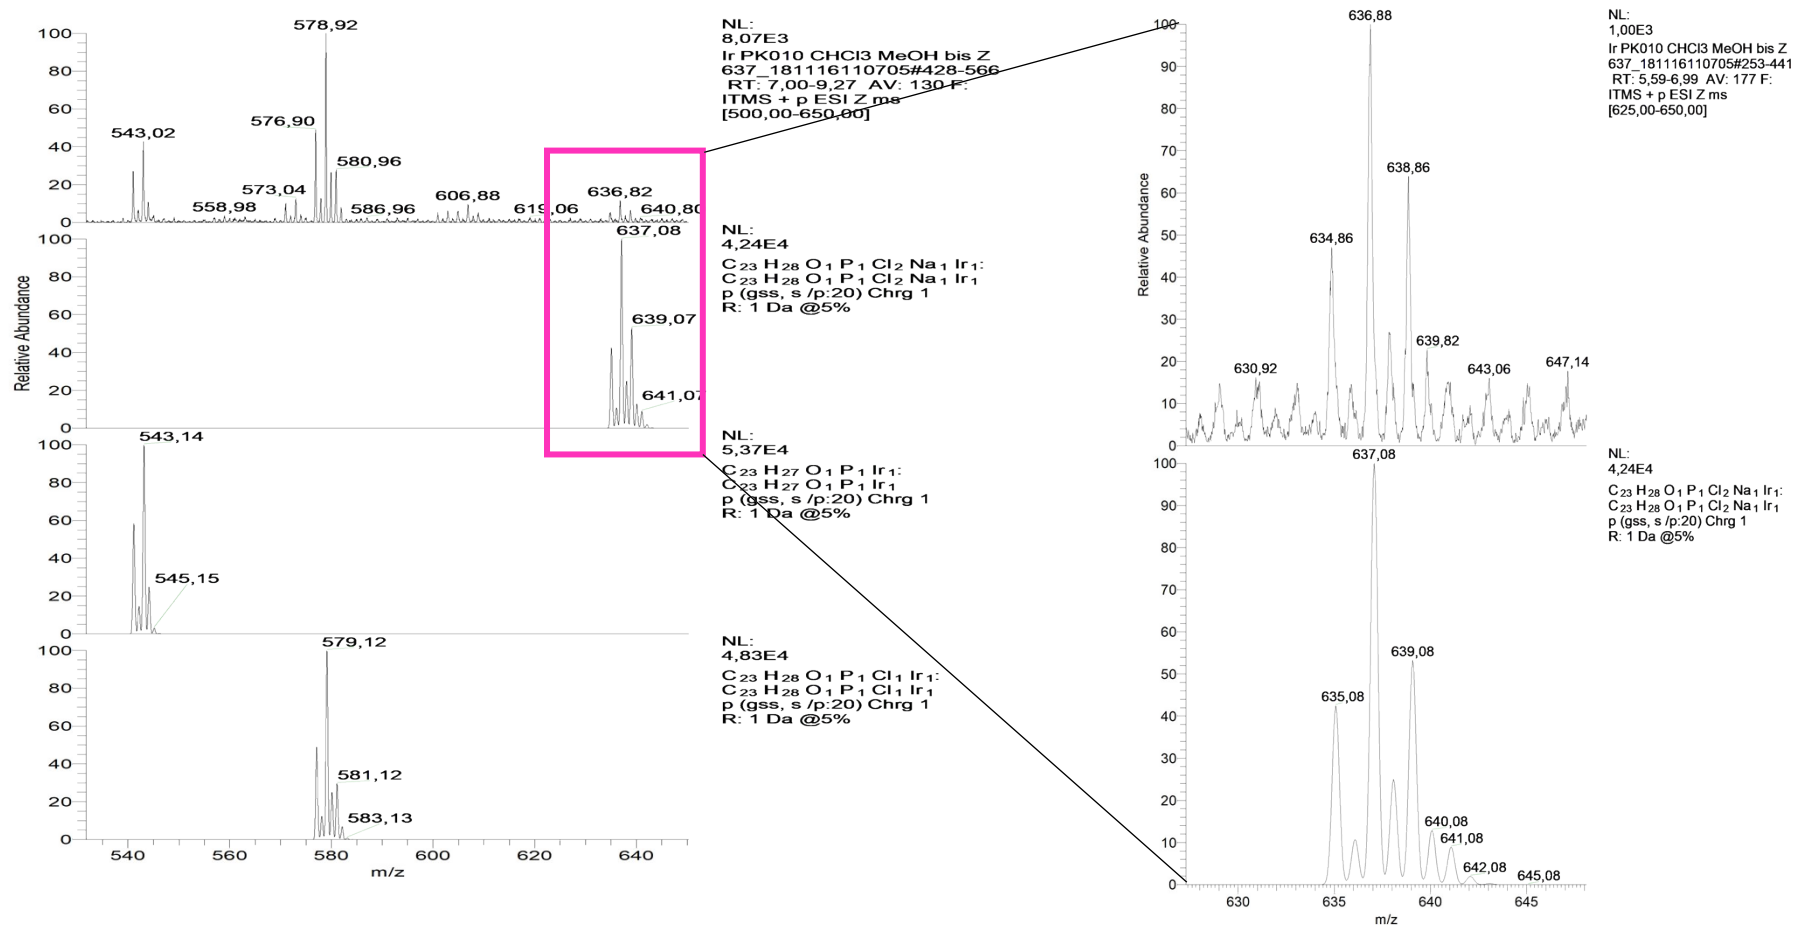

**Figure S12.** Comparison of ion peaks (experimental (top traces) vs calculated (bottom traces)) in the 630 – 650 m/z region of IrPOH. Note the different profile of the cluster centered at m/z 637 ([Ir(Me<sub>5</sub>-Cp)(Cl)<sub>2</sub>(Ph<sub>2</sub>PCH<sub>2</sub>OH) + Na]<sup>+</sup>, containing the IrCl<sub>2</sub> moiety) with respect to that centered at m/z 579 ([Ir(Me<sub>5</sub>-Cp)(Cl)(Ph<sub>2</sub>PCH<sub>2</sub>OH)]<sup>+</sup>, containing the IrCl moiety), and to that centered at m/z 543 ([Ir(Me<sub>5</sub>-Cp)(Ph<sub>2</sub>PCH<sub>2</sub>O)]<sup>+</sup>, containing the Ir ion only).



Ir PK012 CHCl3 MeOH bis Z 697\_181116110705 #1 RT: 0,00 AV: 1 NL: 8,45E4  
T: ITMS + c ESI Full ms [50,00-2000,00]

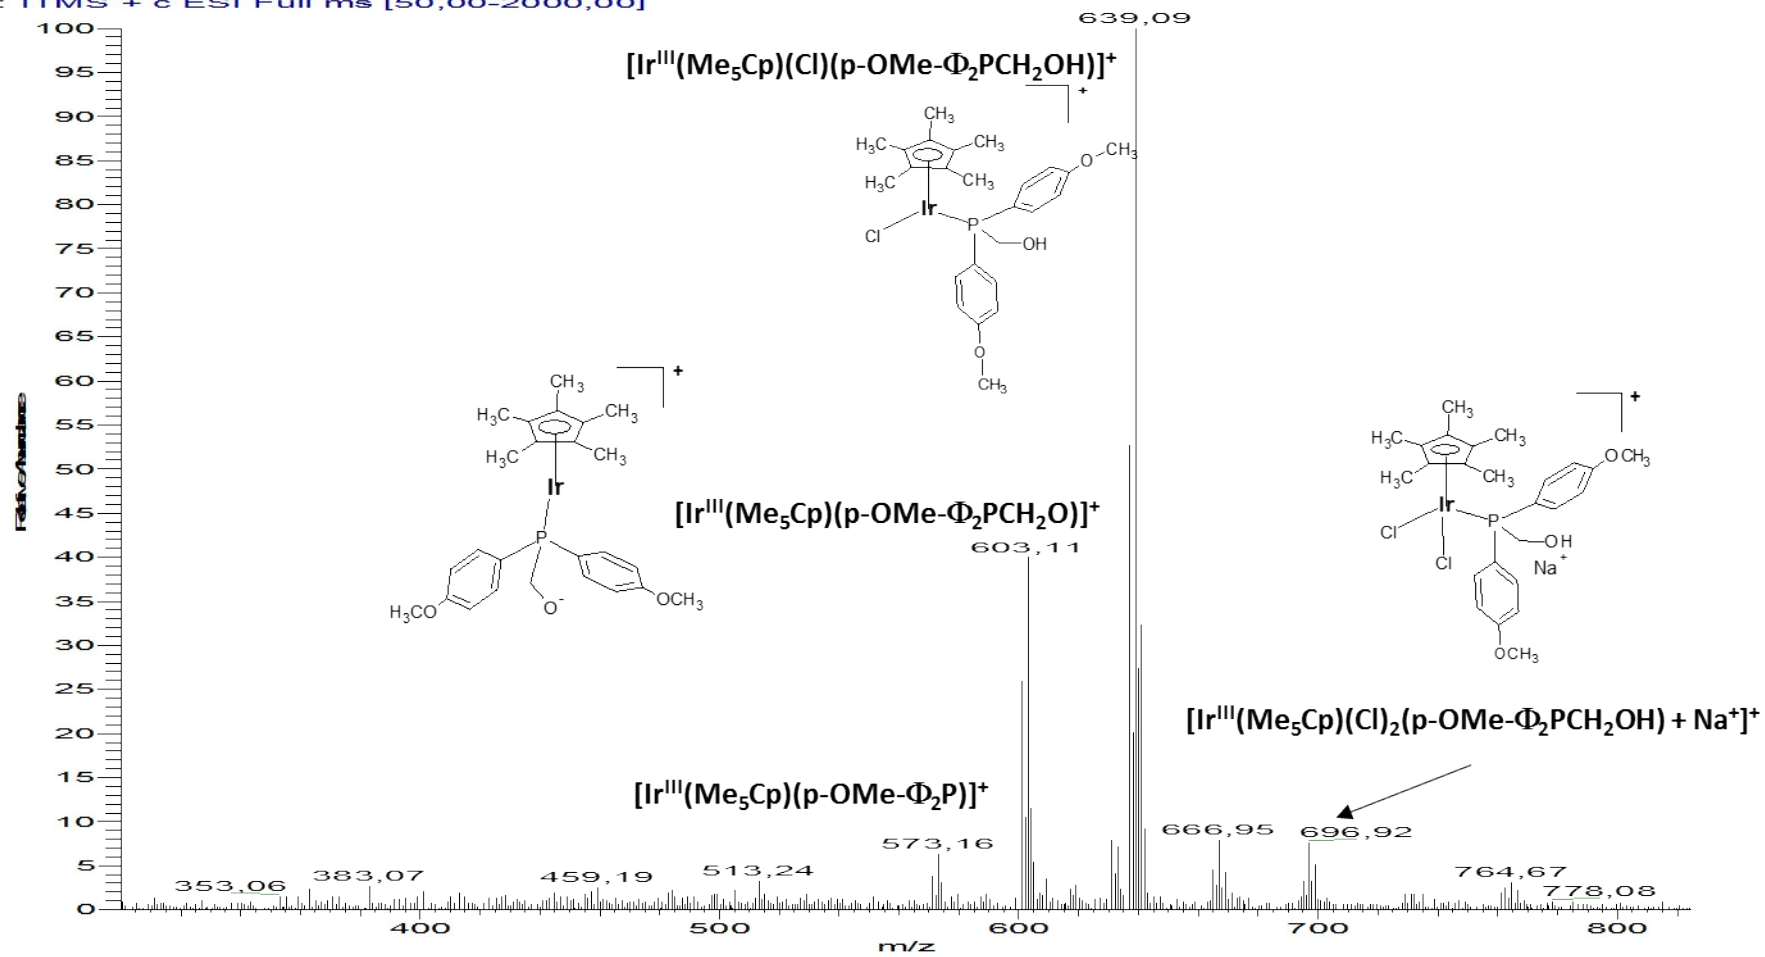

Figure S13. Full ESI(+)-MS spectrum of IrMPOH.

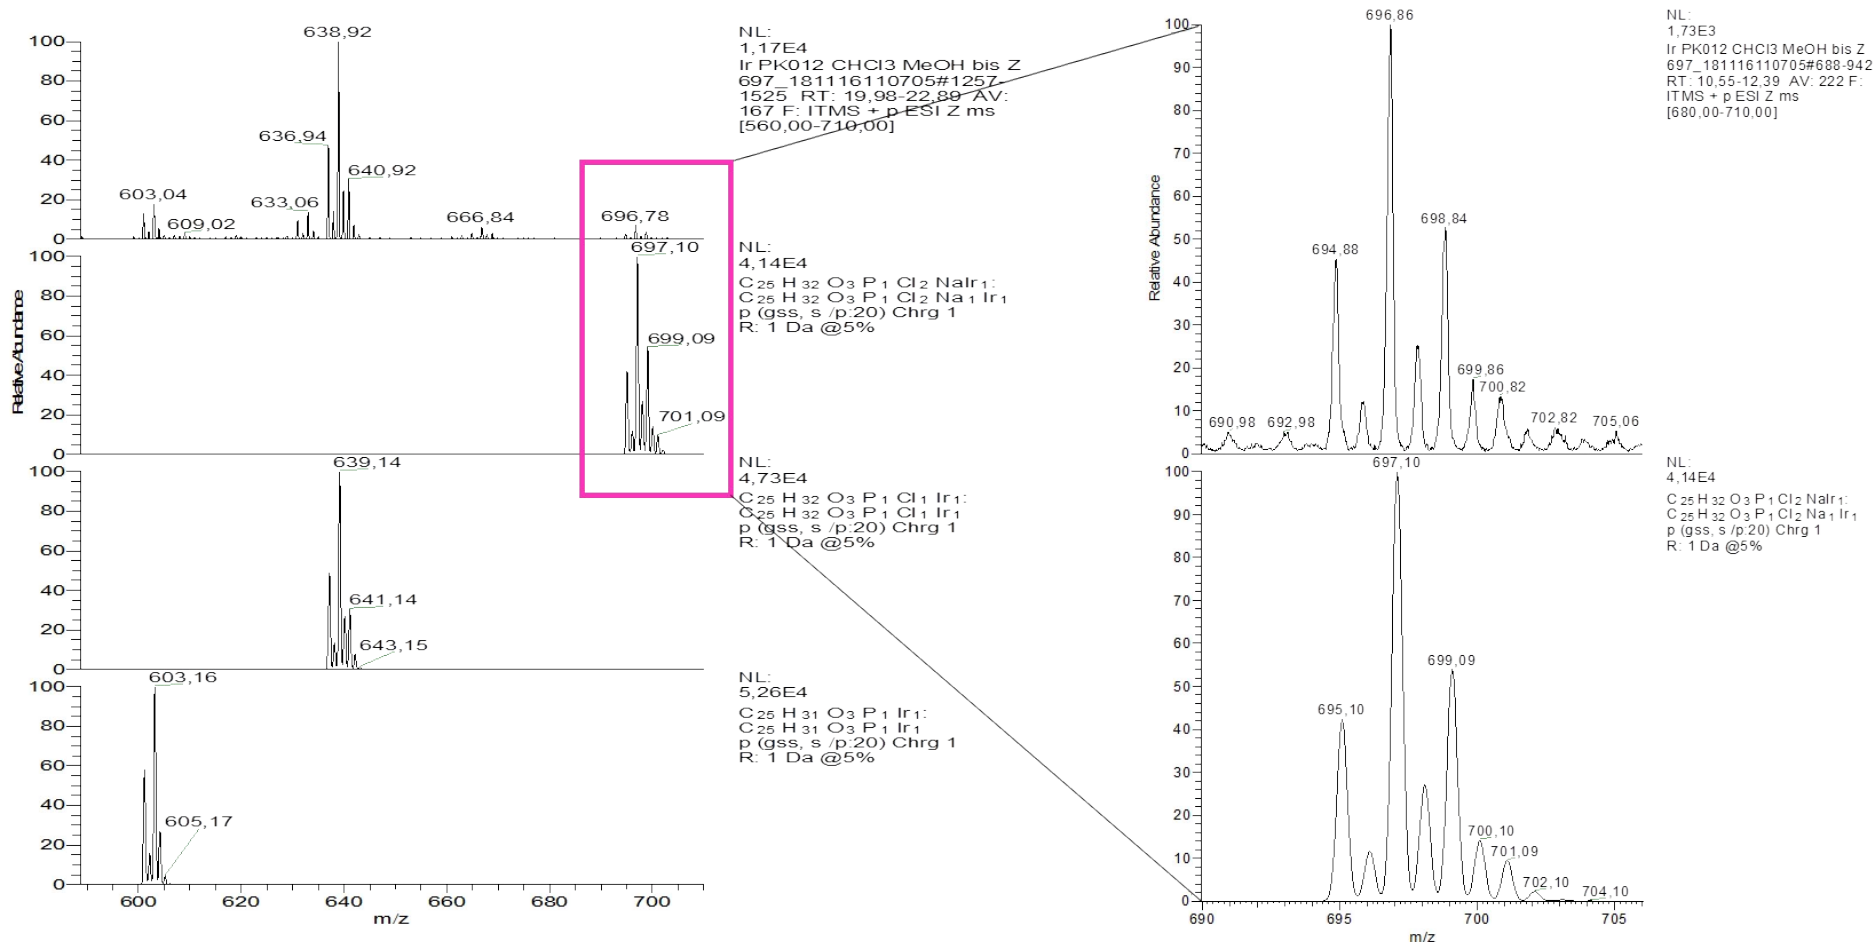

**Figure S14** Comparison of high abundant cluster ion peaks (experimental vs calculated) in the 690 – 710 m/z region of **IrMPOH**. Note the different profile of the cluster centered at m/z 639 (containing the IrCl moiety) with respect to the other two profiles centered at m/z 603 and 697 (containing Ir only).

Ru PK009 CHCl3 MeOH bis Z 545\_181116110705 #939 RT: 11,16 AV: 1 NL: 1,17E5  
T: ITMS + c ESI Full ms [110,00-1000,00]

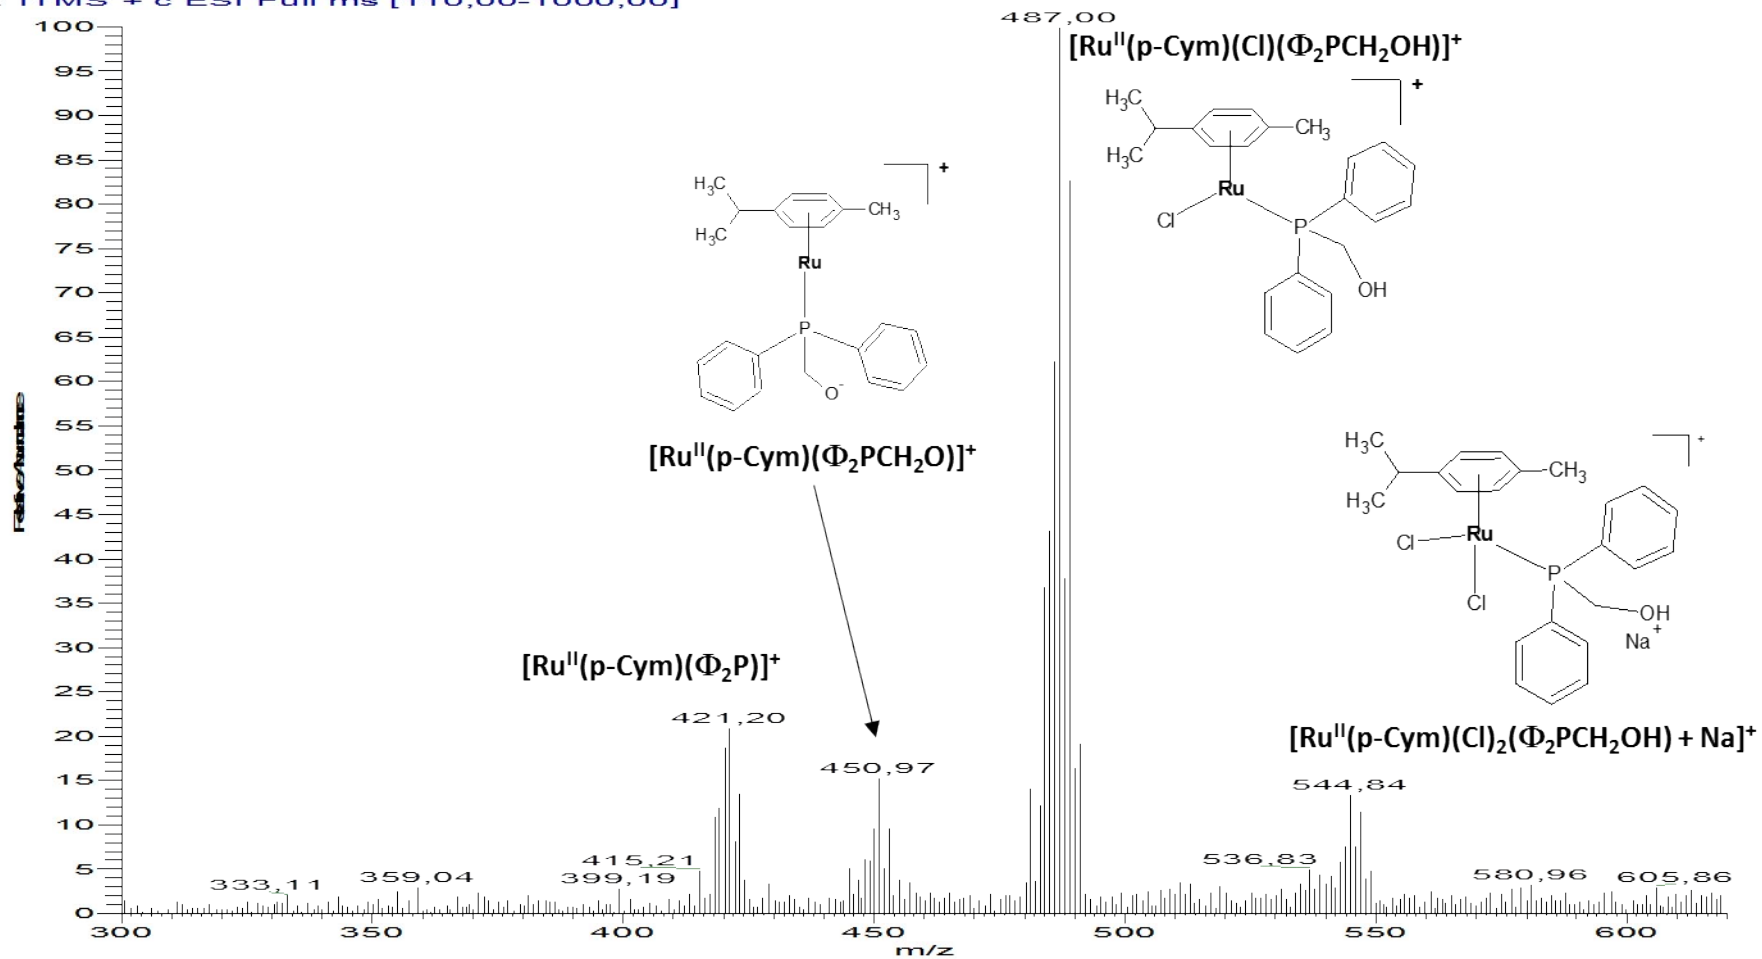

Figure S15. Full ESI(+)-MS spectrum of RuPOH.

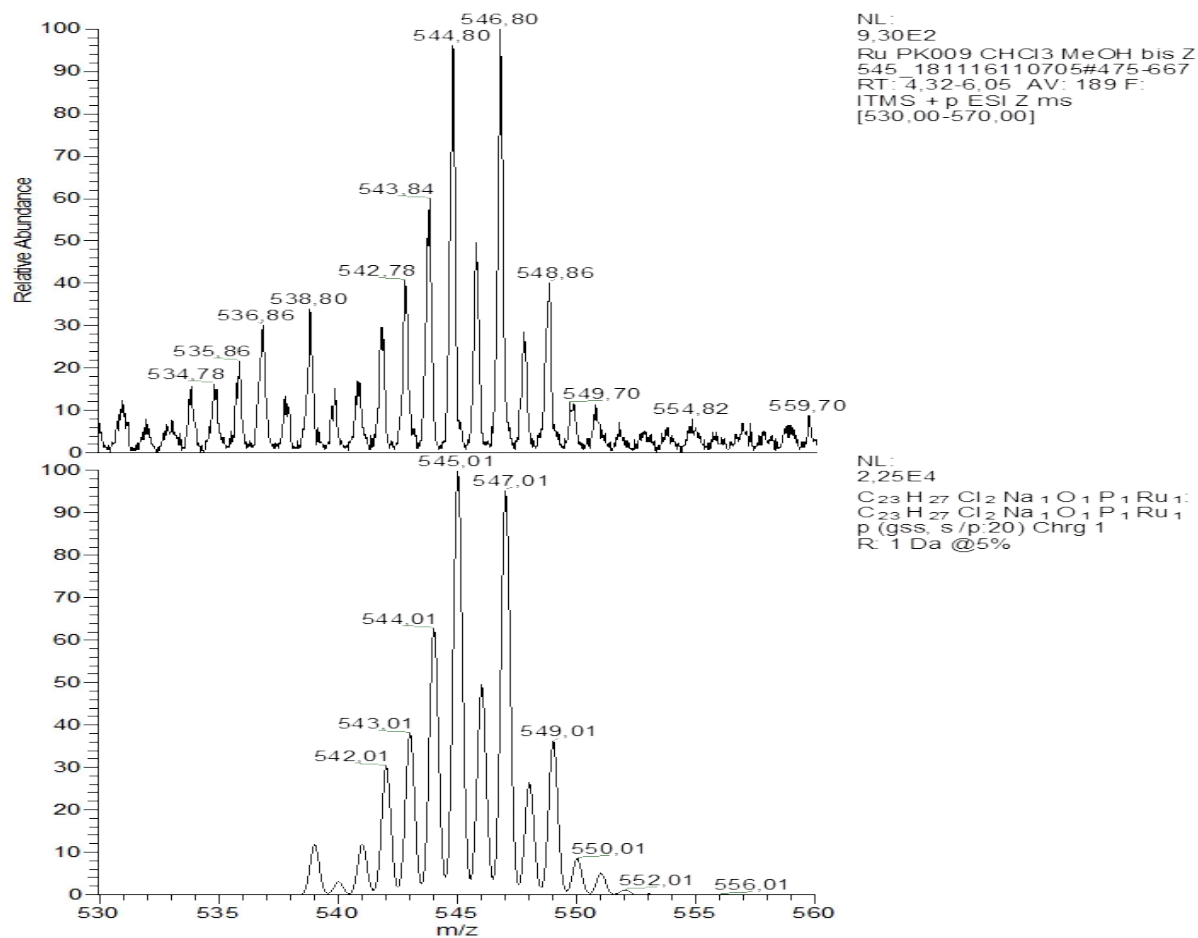

**Figure S16.** Comparison of the cluster ion peak of **RuPOH** centered at m/z 545 (experimental (top) vs calculated (bottom)) corresponding to the sodiated  $[M + Na]^+$  ion.

Ru PK009 CHCl3 MeOH #1156-1582 RT: 7,02-10,35 AV: 73 NL: 1,36E3  
F: ITMS - c ESI Full ms [50,00-1400,00]

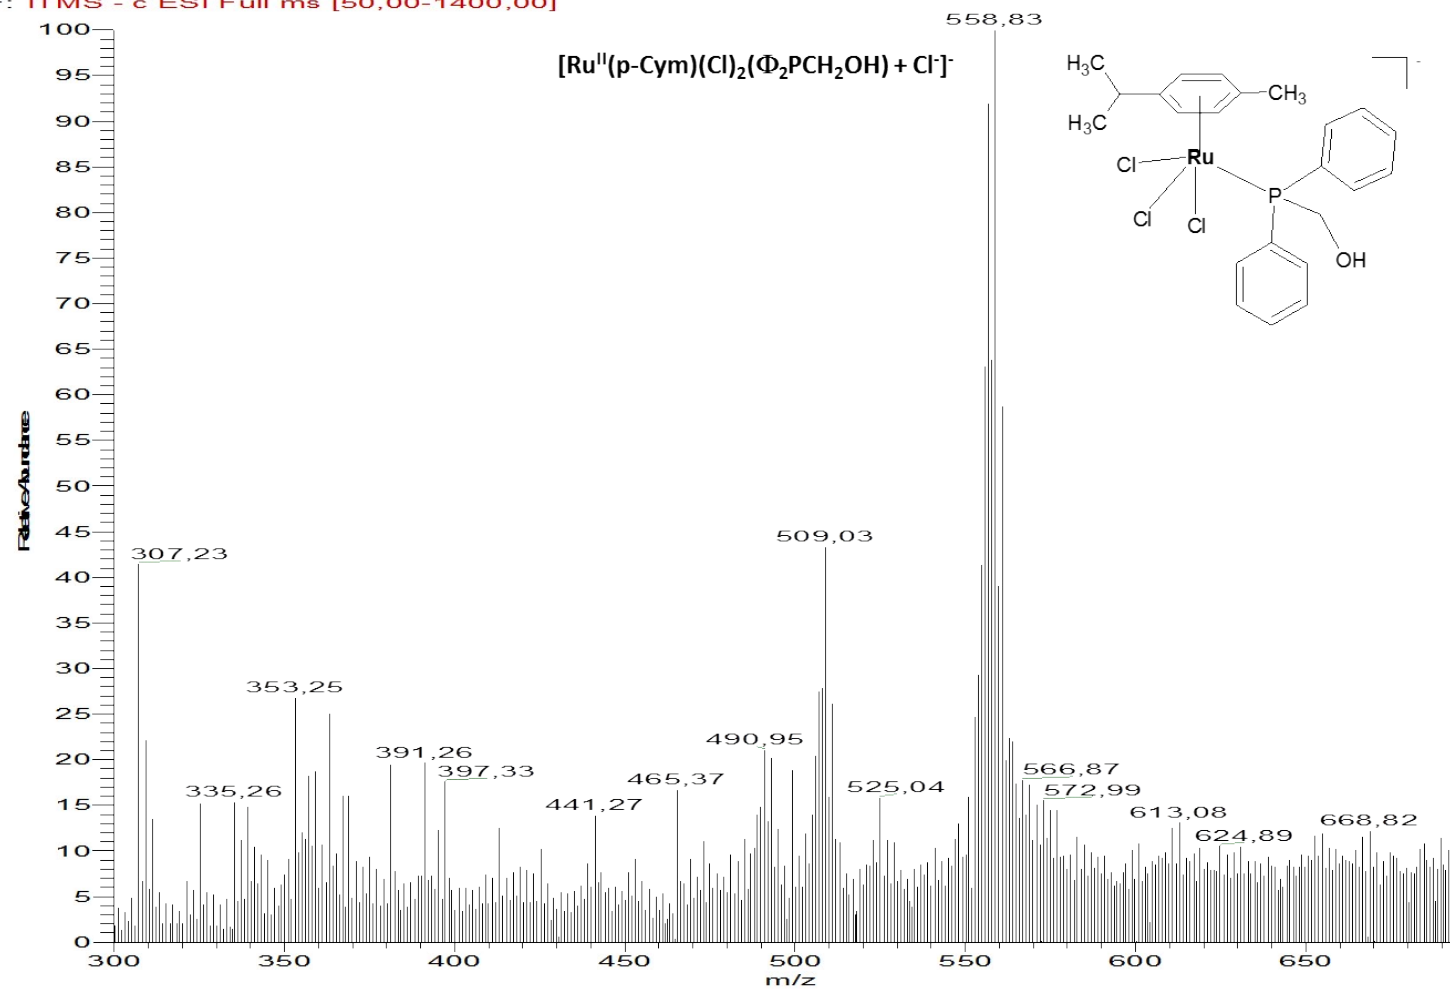

Figure S17. Full ESI(+)-MS spectrum of RuPOH.

Ru PK011 CHCl3 MeOH bis Z 605 181116110705 #610 RT: 6,92 AV: 1 NL: 3,86E4  
T: ITMS + c ESI Full ms [130,00-1000,00]

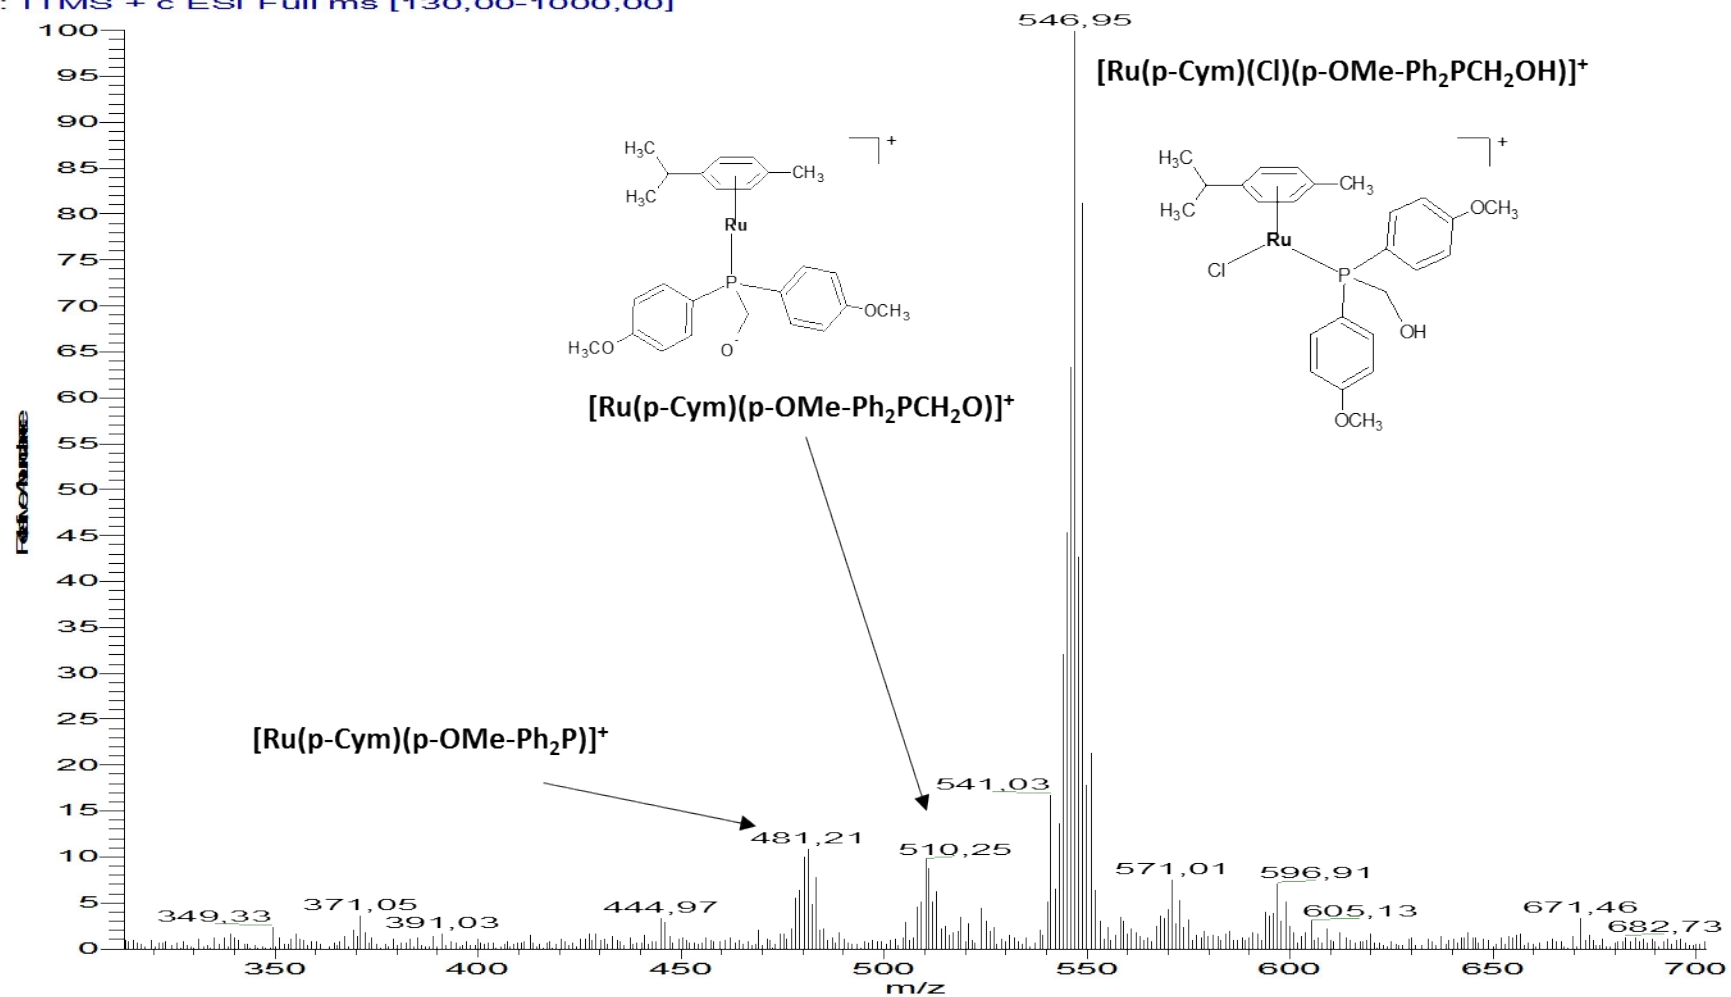

Figure S18. Full ESI(-)MS spectrum of RuMPOH.

Ru PK011 CHCl3 MeOH #498-534 RT: 8,82-9,27 AV: 29 NL: 8,27E2  
F: ITMS - c ESI Full ms [70,00-1300,00]

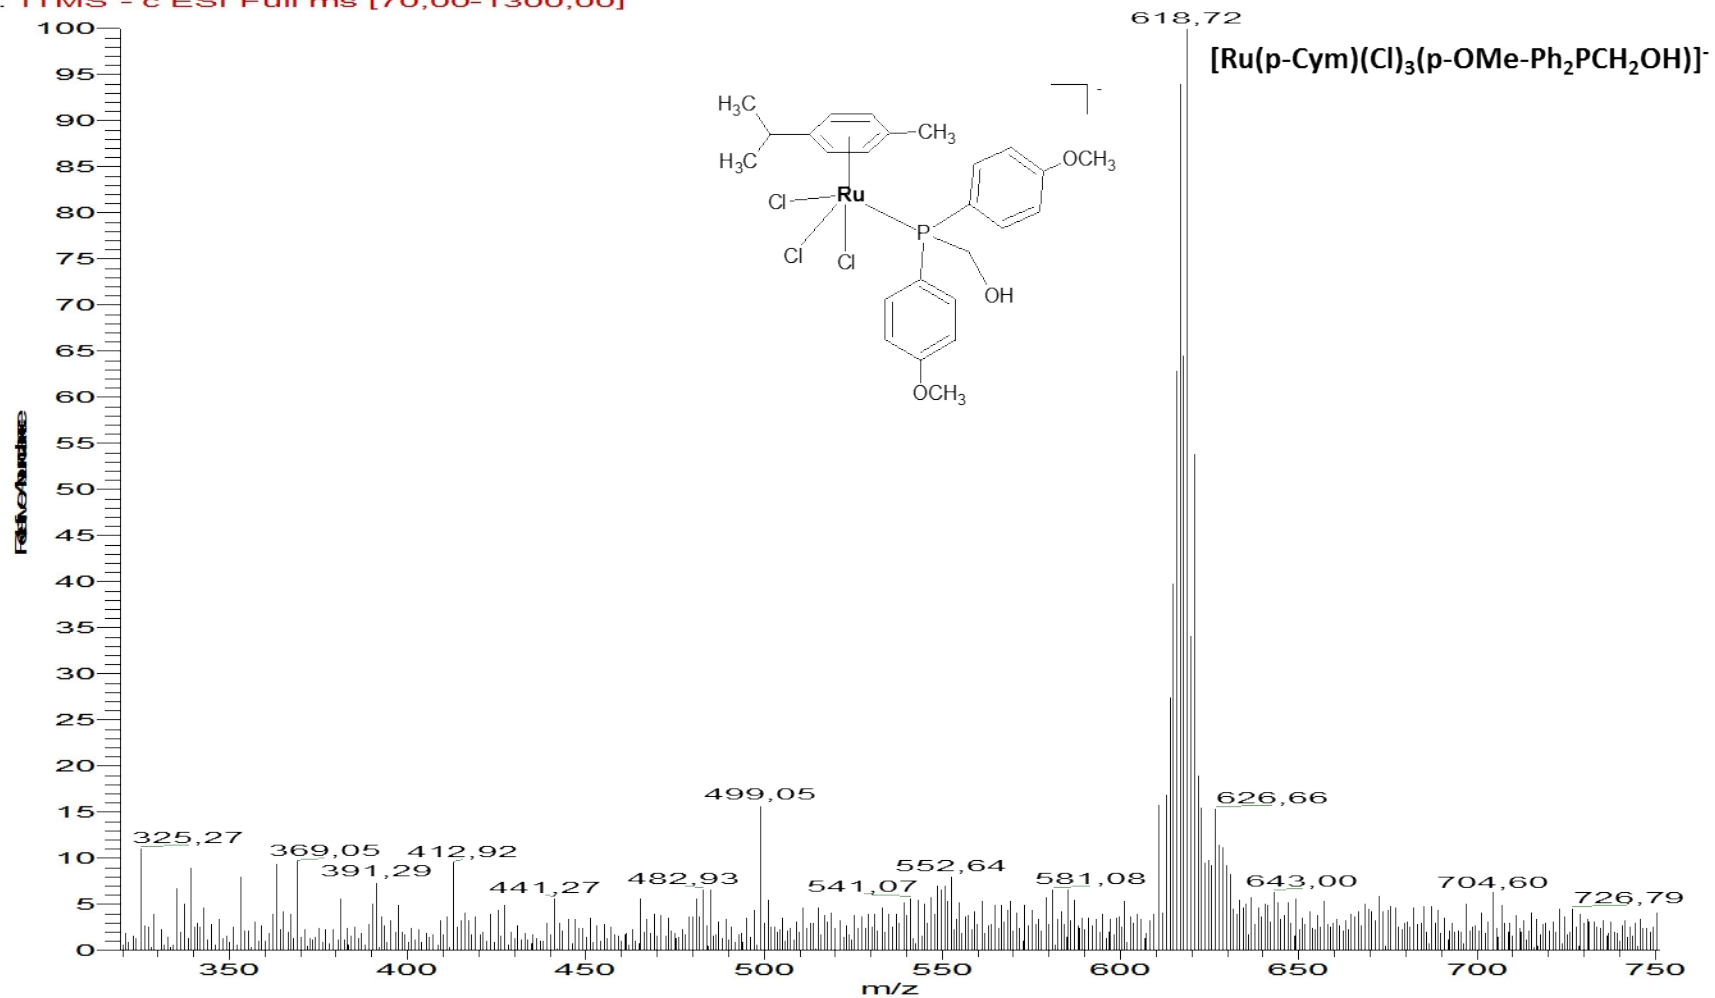

Figure S19. Full ESI(-)MS spectrum of RuMPOH.

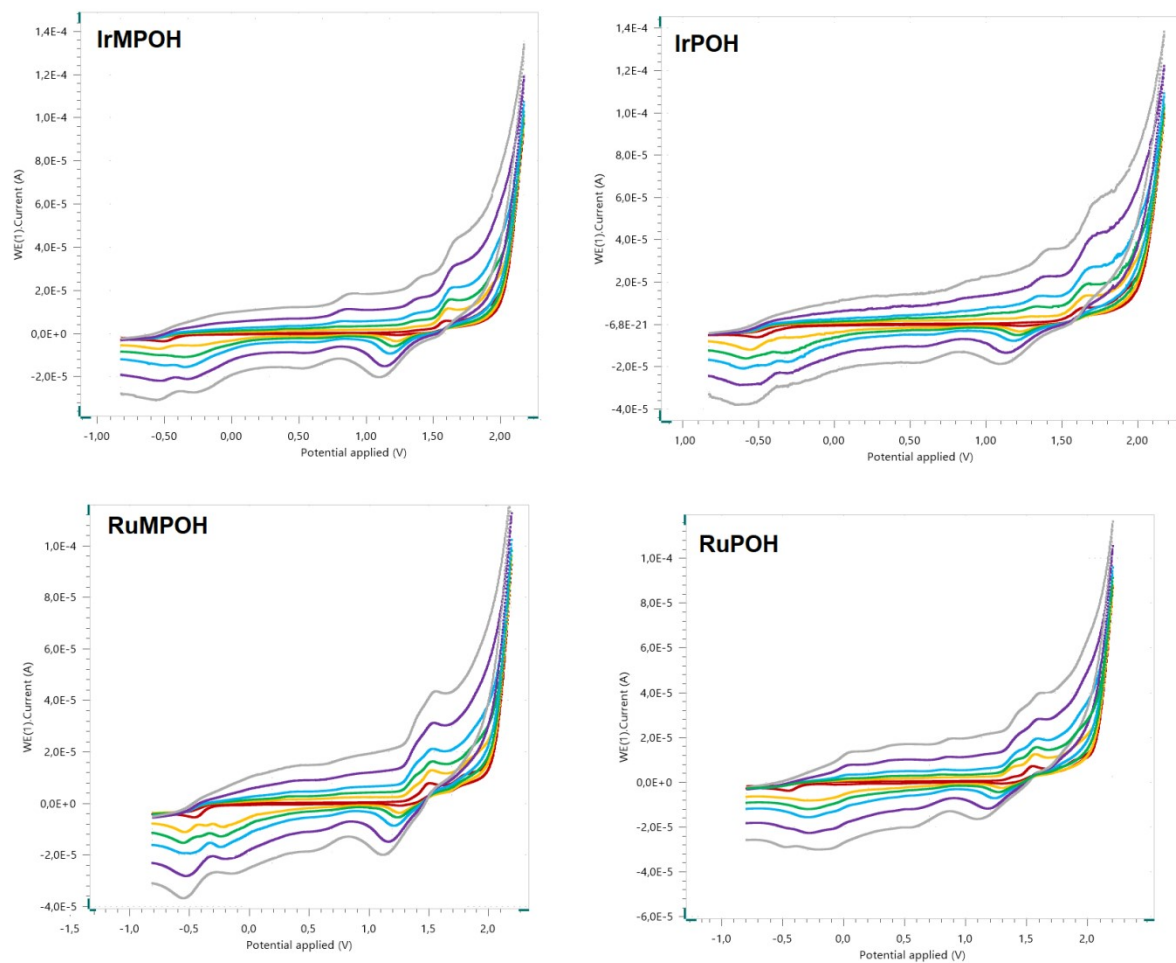

**Figure S20.** Cyclic voltammetric trace of **RuPOH**, **RuMPOH**, **IrPOH** and **IrMPOH** (1 mM) as a function of scan rate, recorded with recorded with 0.1 M tetrabutyl ammonium perchlorate (TBAP) as supporting electrolyte in DMF solution. Scan rates 1 – 100 ( $\text{mV s}^{-1}$ ). Potential (V) versus  $\text{Fc}^{0/+}$ .



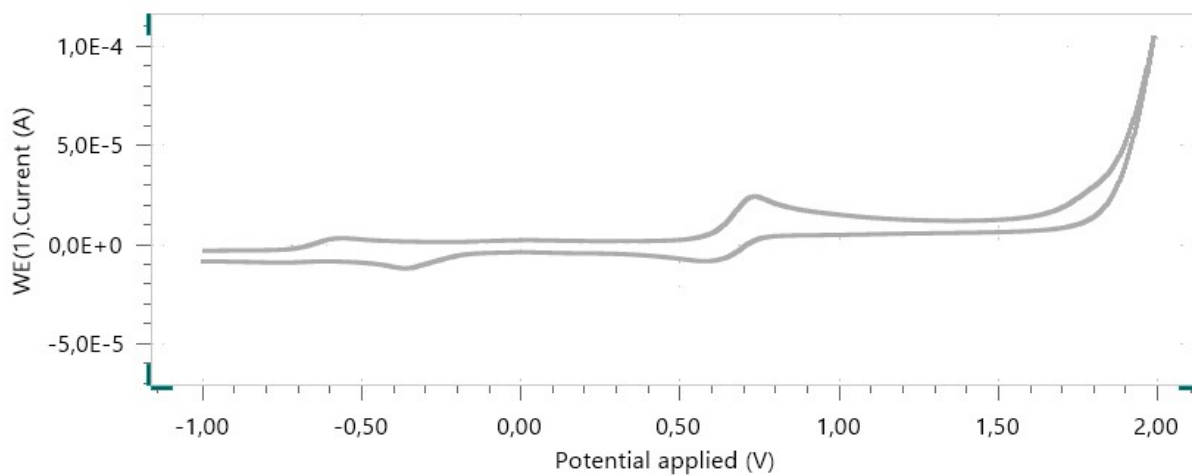

**Figure S21.** CV voltammograms for ferrocene in DMF in the range of potentials from -01 V to 1.2 V. Scan rate: 10 mV s<sup>-1</sup>.

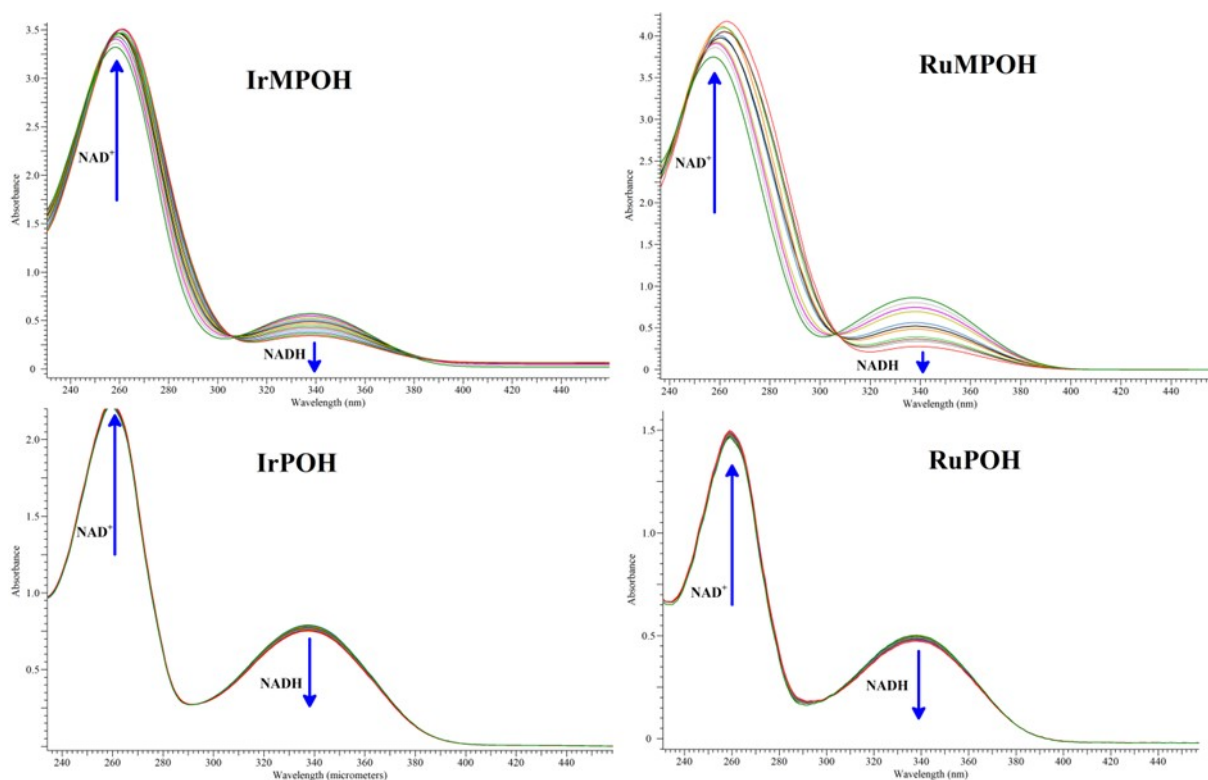

**Figure S22.** UV/Vis spectra of NADH (100  $\mu$ M) were determined after incubated with RuPOH, RuMPOH, IrPOH, IrMPOH (1  $\mu$ M) in CH<sub>3</sub>OH/H<sub>2</sub>O (1 : 9, v/v) at 298 K for 8 h. The arrows show the absorbance change over time.
